# Supplementary material for: The DNA sequence, annotation and analysis of human chromosome 3
Source: Springer Nature journal article supplement (doi:10.1038/nature04728), 2006-04-01
Supplement: nature04728-s2.pdf [file nature04728-s2.pdf]

| Human Gap<br>(Build 35)   | Human          | FibreFISH | Chimp   | Dog    | Mouse  | Rat    | Chicken | Opossum |
|---------------------------|----------------|-----------|---------|--------|--------|--------|---------|---------|
| Chr3:66115834-66375833    | <b>260,000</b> | 117,000   | 260,003 | 69,629 | 96,116 | 95,106 | 57,573  | -       |
| Chr3:195517806- 195537805 | <b>20,000</b>  | *         | 26,722  | -      | 21,934 | 22,605 | 2,510   | 6,325   |

**Supplementary Table 1. Calculation of chromosome 3 euchromatic sequence gap sizes.** The fibre-FISH results were derived by making probes from BAC clones near the gap and subtracting subsequent unique proximal sequence from the original results. (\*) denotes FISH results where subsequent sequence exceeds the original gap estimate. Sizes are in basepairs.

| RNA classes        | Total Number | Methods*       | Number          |
|--------------------|--------------|----------------|-----------------|
| snRNA              | 83           | H.F.           | 72              |
|                    |              | RFAM           | 80              |
| Y RNA              | 46           | H.F.           | 35              |
|                    |              | RFAM           | 45              |
| SnoRNA (C/D box)   | 21           | H.F.           | 6               |
|                    |              | RFAM           | 4               |
|                    |              | snoScan        | 17              |
| SnoRNA (HA/CA box) | 22           | H.F.           | 12              |
|                    |              | Fisher         | 8               |
|                    |              | C.M            | 8               |
| tRNA               | 13           | H.F.           | 10              |
|                    |              | tRNA –Scan     | 9               |
| SRP RNA            | 17           | H.F.           | 1               |
|                    |              | SRP RNA Scan   | 16              |
| miRNA              | 3            | H.F.           | 1               |
|                    |              | RFAM           | 3               |
| mRNA-like ncRNA    | 481          | H.F.-FANTOM    | 1               |
|                    |              | H.F.-FLJ/H-InV | 452             |
|                    |              | Unigene Filter | 28              |
| rRNA               | 10           | H.F.           | 3               |
|                    |              | RFAM           | 7               |
| telomerase RNA     | 1            | H.F.           | 3               |
| 7SK RNA            | 3            | H.F.           | 3               |
| snmRNA             | 2            | H.F.           | 2               |
| scaRNA             | 1            | H.F.           | 1               |
| <b>Total</b>       | 713          |                | 872 (Redundant) |

**Supplementary Table 2. Predicted ncRNA candidates on human chromosome 3.**

\*H.F: Homologues finding with BLAST or sim4 algorithms

U.S.: Human Unigene Screening method

| Seq_Name                               | Method     | Start    | End      | Score       | Complementary | Notes                         |
|----------------------------------------|------------|----------|----------|-------------|---------------|-------------------------------|
| gi 37550867 ref NT_005612.14 Hs3_5769  | Blast      | 181916   | 182007   | 86.02       | +             | Y RNA hY5                     |
| gi 37550867 ref NT_005612.14 Hs3_5769  | Blast      | 45798441 | 45798204 | 87.45       | -             | 7SK RNA 7SK RNA               |
| gi 37550867 ref NT_005612.14 Hs3_5769  | Blast      | 96855110 | 96855348 | 82.85       | +             | 7SK RNA 7SK RNA               |
| gi 37550265 ref NT_029928.11 Hs3_30183 | Blast      | 2543553  | 2543451  | 100         | -             | snRNA U6                      |
| gi 37550163 ref NT_022517.16 Hs3_22673 | Blast      | 40728639 | 40728750 | 95.54       | +             | snmRNA snmRNA                 |
| gi 37550163 ref NT_022517.16 Hs3_22673 | Blast      | 27605901 | 27605901 | 91.96       | -             | snmRNA snmRNA                 |
| gi 37550163 ref NT_022517.16 Hs3_22673 | Blast      | 39375474 | 39375622 | 100         | +             | snoRNA ACA6 snoRNA            |
| gi 37550163 ref NT_022517.16 Hs3_22673 | Blast      | 12821949 | 12821811 | 100         | -             | snoRNA ACA7 snoRNA            |
| gi 37550867 ref NT_005612.14 Hs3_5769  | Blast      | 37693231 | 37693095 | 100         | -             | snoRNA ACA58 snoRNA           |
| gi 37550867 ref NT_005612.14 Hs3_5769  | Blast      | 93000560 | 93000696 | 100         | +             | snoRNA ACA4 snoRNA            |
| gi 37550867 ref NT_005612.14 Hs3_5769  | Blast      | 66728182 | 66727853 | 100         | -             | scaRNA U90                    |
| gi 37550163 ref NT_022517.16 Hs3_22673 | Blast      | 39378137 | 39378290 | 100         | +             | snoRNA E2-1 snoRNA            |
| gi 37549731 ref NT_022459.13 Hs3_22615 | Blast      | 6854833  | 6855018  | 92.47       | +             | snRNA U2                      |
| gi 37550163 ref NT_022517.16 Hs3_22673 | Blast      | 30285992 | 30285777 | 82.95       | -             | snoRNA u3                     |
| gi 37550163 ref NT_022517.16 Hs3_22673 | Blast      | 36935432 | 36935308 | 95.2        | -             | snRNA U6atac                  |
| gi 37550867 ref NT_005612.14 Hs3_5769  | Blast      | 75978006 | 75977409 | 100         | -             | telomerase RNA telomerase RNA |
| gi 37550163 ref NT_022517.16 Hs3_22673 | Blast      | 15720026 | 15720260 | 98.72       | +             | SRP 7SL 7SL                   |
| gi 37550163 ref NT_022517.16 Hs3_22673 | Blast      | 36652156 | 36652485 | 88.22       | +             | 7SK RNA 7SK RNA               |
| gi 37550867 ref NT_005612.14 Hs3_5769  | Sim4       | 10374670 | 10374741 | 100         | -             | tRNA                          |
| gi 37550163 ref NT_022517.16 Hs3_22673 | Sim4       | 13773887 | 13773954 | 100         | +             | tRNA                          |
| gi 37550867 ref NT_005612.14 Hs3_5769  | Sim4       | 54811717 | 54811788 | 100         | -             | tRNA                          |
| gi 37550867 ref NT_005612.14 Hs3_5769  | Sim4       | 54716382 | 54716463 | 100         | -             | tRNA                          |
| gi 37550867 ref NT_005612.14 Hs3_5769  | Sim4       | 2831947  | 2832199  | 100         | -             | tRNA                          |
| gi 37550163 ref NT_022517.16 Hs3_22673 | Sim4       | 40219213 | 40220857 | 100         | +             | rRNA                          |
| gi 37550867 ref NT_005612.14 Hs3_5769  | Sim4       | 2832295  | 2832420  | 100         | -             | rRNA                          |
| gi 37550867 ref NT_005612.14 Hs3_5769  | Rfam       | 34177606 | 34177721 | 36.81       | +             | rRNA                          |
| gi 37550867 ref NT_005612.14 Hs3_5769  | Rfam       | 57401044 | 57401149 | 56.32       | +             | rRNA                          |
| gi 37550867 ref NT_005612.14 Hs3_5769  | Rfam       | 32778675 | 32778562 | 53.27       | -             | rRNA                          |
| gi 37550867 ref NT_005612.14 Hs3_5769  | Rfam       | 39924173 | 39924054 | 25.81       | -             | rRNA                          |
| gi 37550867 ref NT_005612.14 Hs3_5769  | Rfam       | 40997547 | 40997438 | 58.28       | -             | rRNA                          |
| gi 37550867 ref NT_005612.14 Hs3_5769  | Rfam       | 43732250 | 43732148 | 29.27       | -             | rRNA                          |
| gi 37550867 ref NT_005612.14 Hs3_5769  | Rfam       | 48805788 | 48805678 | 32.17       | -             | rRNA                          |
| gi 37550867 ref NT_005612.14 Hs3_5769  | Rfam       | 9373952  | 9374101  | 76.65       | +             | U1 snRNA                      |
| gi 37550867 ref NT_005612.14 Hs3_5769  | Rfam       | 98942654 | 98942505 | 56.27       | -             | U1 snRNA                      |
| gi 37550867 ref NT_005612.14 Hs3_5769  | Rfam       | 77207980 | 77207834 | 69.99       | -             | U1 snRNA                      |
| gi 37550867 ref NT_005612.14 Hs3_5769  | Rfam/Blast | 48634362 | 48634215 | 62.43/85.12 | -             | U1 snRNA                      |
| gi 37550867 ref NT_005612.14 Hs3_5769  | Rfam/Blast | 32374293 | 32374441 | 81.53/85.92 | -             | U1 snRNA                      |
| gi 37549731 ref NT_022459.13 Hs3_22615 | Rfam       | 6320533  | 6320682  | 59.92       | +             | U1 snRNA                      |
| gi 37550867 ref NT_005612.14 Hs3_5769  | Rfam       | 56454718 | 56454866 | 42.52       | +             | U2 snRNA                      |
| gi 37550867 ref NT_005612.14 Hs3_5769  | Rfam       | 74688144 | 74688289 | 56.11       | +             | U2 snRNA                      |
| gi 37550867 ref NT_005612.14 Hs3_5769  | Rfam       | 34289246 | 34289106 | 50.6        | -             | U2 snRNA                      |
| gi 37550867 ref NT_005612.14 Hs3_5769  | Rfam       | 76270247 | 76270374 | 60.03       | +             | U4 snRNA                      |
| gi 37550867 ref NT_005612.14 Hs3_5769  | Rfam       | 81822425 | 81822542 | 53.64       | +             | U4 snRNA                      |
| gi 37550867 ref NT_005612.14 Hs3_5769  | Rfam       | 79009506 | 79009371 | 46.34       | -             | U4 snRNA                      |
| gi 37550867 ref NT_005612.14 Hs3_5769  | Rfam       | 27869597 | 27869469 | 50.37       | -             | U4 snRNA                      |
| gi 37550163 ref NT_022517.16 Hs3_22673 | Rfam       | 19978299 | 19978435 | 57.55       | +             | U4 snRNA                      |
| gi 37550163 ref NT_022517.16 Hs3_22673 | Rfam       | 39937208 | 39937349 | 82.23       | +             | U4 snRNA                      |
| gi 37550163 ref NT_022517.16 Hs3_22673 | Rfam       | 42188924 | 42189049 | 40.02       | +             | U4 snRNA                      |
| gi 37550265 ref NT_029928.11 Hs3_30183 | Rfam       | 1093929  | 1093789  | 29.77       | -             | U4 snRNA                      |
| gi 29789894 ref NT_005535.15 Hs3_5692  | Rfam       | 1083767  | 1083659  | 50.67       | -             | Y RNA                         |
| gi 37550867 ref NT_005612.14 Hs3_5769  | Rfam       | 7672520  | 7672614  | 35.3        | +             | Y RNA                         |
| gi 37550867 ref NT_005612.14 Hs3_5769  | Rfam       | 7861411  | 7861510  | 52.8        | +             | Y RNA                         |
| gi 37550867 ref NT_005612.14 Hs3_5769  | Rfam       | 8169067  | 8169173  | 45.76       | +             | Y RNA                         |
| gi 37550867 ref NT_005612.14 Hs3_5769  | Rfam       | 12729890 | 12729989 | 31.72       | +             | Y RNA                         |
| gi 37550867 ref NT_005612.14 Hs3_5769  | Rfam/Blast | 12902671 | 12902770 | 59.21/92.08 | +             | Y RNA                         |
| gi 37550867 ref NT_005612.14 Hs3_5769  | Rfam       | 16941014 | 16941112 | 45.03       | +             | Y RNA                         |
| gi 37550867 ref NT_005612.14 Hs3_5769  | Rfam/Blast | 26424313 | 26424412 | 59.90/91.23 | +             | Y RNA                         |
| gi 37550867 ref NT_005612.14 Hs3_5769  | Rfam       | 31730969 | 31731074 | 42.24       | +             | Y RNA                         |
| gi 37550867 ref NT_005612.14 Hs3_5769  | Rfam       | 36032929 | 36033028 | 41.81       | +             | Y RNA                         |
| gi 37550867 ref NT_005612.14 Hs3_5769  | Rfam       | 42802205 | 42802305 | 42.91       | +             | Y RNA                         |
| gi 37550867 ref NT_005612.14 Hs3_5769  | Rfam       | 58662215 | 58662325 | 48.11       | +             | Y RNA                         |
| gi 37550867 ref NT_005612.14 Hs3_5769  | Rfam       | 59820320 | 59820419 | 41.81       | +             | Y RNA                         |
| gi 37550867 ref NT_005612.14 Hs3_5769  | Rfam/Blast | 63366495 | 63366586 | 35.25/91.53 | +             | Y RNA                         |
| gi 37550867 ref NT_005612.14 Hs3_5769  | Rfam/Blast | 76457728 | 76457825 | 57.42/92.42 | +             | Y RNA                         |
| gi 37550867 ref NT_005612.14 Hs3_5769  | Rfam       | 85310677 | 85310784 | 33.85       | +             | Y RNA                         |
| gi 37550867 ref NT_005612.14 Hs3_5769  | Rfam       | 97854083 | 97854182 | 46.35       | +             | Y RNA                         |
| gi 37550867 ref NT_005612.14 Hs3_5769  | Rfam/Blast | 99837136 | 99837246 | 55.05/93.33 | +             | Y RNA                         |
| gi 37550867 ref NT_005612.14 Hs3_5769  | Rfam       | 97854371 | 97854272 | 32.47       | -             | Y RNA                         |
| gi 37550867 ref NT_005612.14 Hs3_5769  | Rfam/Blast | 90299849 | 90299739 | 54.38/87.39 | -             | Y RNA                         |
| gi 37550867 ref NT_005612.14 Hs3_5769  | Rfam       | 83333746 | 83333639 | 36.45       | -             | Y RNA                         |
| gi 37550867 ref NT_005612.14 Hs3_5769  | Rfam       | 71335769 | 71335661 | 44.97       | -             | Y RNA                         |
| gi 37550867 ref NT_005612.14 Hs3_5769  | Rfam/Blast | 55307407 | 55307297 | 49.60/97.33 | -             | Y RNA                         |
| gi 37550867 ref NT_005612.14 Hs3_5769  | Rfam/Blast | 37128450 | 37128340 | 41.80/90.67 | -             | Y RNA                         |
| gi 37550867 ref NT_005612.14 Hs3_5769  | Rfam       | 33416470 | 33416371 | 34.88       | -             | Y RNA                         |
| gi 37550867 ref NT_005612.14 Hs3_5769  | Rfam       | 28239297 | 28239190 | 33.01       | -             | Y RNA                         |
| gi 37550867 ref NT_005612.14 Hs3_5769  | Rfam       | 7876154  | 7876052  | 36.93       | -             | Y RNA                         |
| gi 37549731 ref NT_022459.13 Hs3_22615 | Rfam       | 22175029 | 22175145 | 50.26       | +             | Y RNA                         |
| gi 37550163 ref NT_022517.16 Hs3_22673 | Rfam       | 23255263 | 23255364 | 56.75       | +             | Y RNA                         |
| gi 37550163 ref NT_022517.16 Hs3_22673 | Rfam       | 37981684 | 37981783 | 44.49       | +             | Y RNA                         |
| gi 37550163 ref NT_022517.16 Hs3_22673 | Rfam       | 43439561 | 43439678 | 27.94       | +             | Y RNA                         |

|                                       |            |          |          |               |   |                  |
|---------------------------------------|------------|----------|----------|---------------|---|------------------|
| gj37550163 ref NT 022517.16 Hs3 22673 | Rfam       | 45870271 | 45870380 | 53.9          | + | Y RNA            |
| gj37550163 ref NT 022517.16 Hs3 22673 | Rfam       | 47468165 | 47468262 | 31.21         | + | Y RNA            |
| gj37550163 ref NT 022517.16 Hs3 22673 | Rfam       | 48255669 | 48255774 | 58.63         | + | Y RNA            |
| gj37550163 ref NT 022517.16 Hs3 22673 | Rfam       | 49231577 | 49231682 | 28.21         | + | Y RNA            |
| gj37550163 ref NT 022517.16 Hs3 22673 | Rfam       | 53247006 | 53247115 | 40.8          | + | Y RNA            |
| gj37550163 ref NT 022517.16 Hs3 22673 | Rfam       | 65911953 | 65911854 | 46.06         | - | Y RNA            |
| gj37550163 ref NT 022517.16 Hs3 22673 | Rfam       | 47898996 | 47898892 | 42.49         | - | Y RNA            |
| gj37550163 ref NT 022517.16 Hs3 22673 | Rfam       | 41836179 | 41836084 | 43.31         | - | Y RNA            |
| gj37550163 ref NT 022517.16 Hs3 22673 | Rfam/Blast | 38472697 | 38472598 | 59.22/92.42   | - | Y RNA            |
| gj37550163 ref NT 022517.16 Hs3 22673 | Rfam       | 38092510 | 38092410 | 30.8          | - | Y RNA            |
| gj37550163 ref NT 022517.16 Hs3 22673 | Rfam       | 37060350 | 37060251 | 55.89         | - | Y RNA            |
| gj37550163 ref NT 022517.16 Hs3 22673 | Rfam/Blast | 27529314 | 27529215 | 57.89/93.94   | - | Y RNA            |
| gj37550163 ref NT 022517.16 Hs3 22673 | Rfam       | 20174331 | 20174241 | 31.89         | - | Y RNA            |
| gj37550163 ref NT 022517.16 Hs3 22673 | Rfam/Blast | 5067964  | 5067865  | 60.78/85.00   | - | Y RNA            |
| gj29789894 ref NT 005535.15 Hs3 5692  | Rfam/Blast | 879008   | 879114   | 133.32/95.33  | + | U6 snRNA         |
| gj37550867 ref NT 005612.14 Hs3 5769  | Rfam       | 191019   | 191127   | 86.79         | + | U6 snRNA         |
| gj37550867 ref NT 005612.14 Hs3 5769  | Rfam/Blast | 5122449  | 5122554  | 115.04/90.65  | + | U6 snRNA         |
| gj37550867 ref NT 005612.14 Hs3 5769  | Rfam       | 7166617  | 7166723  | 78.9          | + | U6 snRNA         |
| gj37550867 ref NT 005612.14 Hs3 5769  | Rfam/Blast | 23758198 | 23758304 | 98.42/85.98   | + | U6 snRNA         |
| gj37550867 ref NT 005612.14 Hs3 5769  | Rfam       | 48359450 | 48359551 | 65.55         | + | U6 snRNA         |
| gj37550867 ref NT 005612.14 Hs3 5769  | Rfam       | 52784418 | 52784532 | 106.95        | + | U6 snRNA         |
| gj37550867 ref NT 005612.14 Hs3 5769  | Rfam       | 76362791 | 76362897 | 86.82         | + | U6 snRNA         |
| gj37550867 ref NT 005612.14 Hs3 5769  | Rfam       | 81980495 | 81980607 | 86.99         | + | U6 snRNA         |
| gj37550867 ref NT 005612.14 Hs3 5769  | Rfam       | 86794003 | 86794109 | 82.73         | + | U6 snRNA         |
| gj37550867 ref NT 005612.14 Hs3 5769  | Rfam/Blast | 87444683 | 87444789 | 134.37/100.00 | + | U6 snRNA         |
| gj37550867 ref NT 005612.14 Hs3 5769  | Rfam       | 92984894 | 92984788 | 76.48         | - | U6 snRNA         |
| gj37550867 ref NT 005612.14 Hs3 5769  | Rfam       | 84220725 | 84220618 | 63.8          | - | U6 snRNA         |
| gj37550867 ref NT 005612.14 Hs3 5769  | Rfam       | 83339066 | 83338963 | 82.55         | - | U6 snRNA         |
| gj37550867 ref NT 005612.14 Hs3 5769  | Rfam       | 81610291 | 81610193 | 84.15         | - | U6 snRNA         |
| gj37550867 ref NT 005612.14 Hs3 5769  | Rfam/Blast | 77717298 | 77717192 | 94.33/89.72   | - | U6 snRNA         |
| gj37550867 ref NT 005612.14 Hs3 5769  | Rfam/Blast | 75933239 | 75933133 | 105.56/93.46  | - | U6 snRNA         |
| gj37550867 ref NT 005612.14 Hs3 5769  | Rfam       | 59684514 | 59684409 | 80.31         | - | U6 snRNA         |
| gj37550867 ref NT 005612.14 Hs3 5769  | Rfam/Blast | 53209654 | 53209548 | 87.76/85.98   | - | U6 snRNA         |
| gj37550867 ref NT 005612.14 Hs3 5769  | Rfam/Blast | 48117026 | 48116920 | 97.29/84.76   | - | U6 snRNA         |
| gj37550867 ref NT 005612.14 Hs3 5769  | Rfam       | 42644179 | 42644080 | 72.36         | - | U6 snRNA         |
| gj37550867 ref NT 005612.14 Hs3 5769  | Rfam/Blast | 37306925 | 37306819 | 84.99/86.67   | - | U6 snRNA         |
| gj37550867 ref NT 005612.14 Hs3 5769  | Rfam       | 33455071 | 33454969 | 73.91         | - | U6 snRNA         |
| gj37550867 ref NT 005612.14 Hs3 5769  | Rfam       | 31333188 | 31333087 | 87.93         | - | U6 snRNA         |
| gj37550867 ref NT 005612.14 Hs3 5769  | Rfam       | 25555933 | 25555830 | 88.4          | - | U6 snRNA         |
| gj37550867 ref NT 005612.14 Hs3 5769  | Rfam       | 8969160  | 8969042  | 81.72         | - | U6 snRNA         |
| gj37550867 ref NT 005612.14 Hs3 5769  | Rfam/Blast | 5019074  | 5018968  | 121.13/95.33  | - | U6 snRNA         |
| gj37550867 ref NT 005612.14 Hs3 5769  | Rfam       | 2822907  | 2822808  | 92.57         | - | U6 snRNA         |
| gj37549731 ref NT 022459.13 Hs3 22615 | Rfam       | 4552131  | 4552233  | 90.6          | + | U6 snRNA         |
| gj37549731 ref NT 022459.13 Hs3 22615 | Rfam       | 10835896 | 10836015 | 72.72         | + | U6 snRNA         |
| gj37549731 ref NT 022459.13 Hs3 22615 | Rfam       | 21486487 | 21486381 | 87.84         | - | U6 snRNA         |
| gj37549731 ref NT 022459.13 Hs3 22615 | Rfam       | 11555683 | 11555580 | 77.22         | - | U6 snRNA         |
| gj37549731 ref NT 022459.13 Hs3 22615 | Rfam       | 6985735  | 6985628  | 91.18         | - | U6 snRNA         |
| gj37549731 ref NT 022459.13 Hs3 22615 | Rfam       | 50501    | 50395    | 106.66        | - | U6 snRNA         |
| gj37550163 ref NT 022517.16 Hs3 22673 | Rfam       | 10019236 | 10019339 | 68.19         | + | U6 snRNA         |
| gj37550163 ref NT 022517.16 Hs3 22673 | Rfam       | 15321260 | 15321362 | 86.79         | + | U6 snRNA         |
| gj37550163 ref NT 022517.16 Hs3 22673 | Rfam       | 37107443 | 37107546 | 74.12         | + | U6 snRNA         |
| gj37550163 ref NT 022517.16 Hs3 22673 | Rfam       | 38993089 | 38993195 | 93.15         | + | U6 snRNA         |
| gj37550163 ref NT 022517.16 Hs3 22673 | Rfam       | 57420525 | 57420630 | 104.13        | + | U6 snRNA         |
| gj37550163 ref NT 022517.16 Hs3 22673 | Rfam       | 57456913 | 57457020 | 79.13         | + | U6 snRNA         |
| gj37550163 ref NT 022517.16 Hs3 22673 | Rfam       | 57444433 | 57444330 | 69.62         | - | U6 snRNA         |
| gj37550163 ref NT 022517.16 Hs3 22673 | Rfam       | 38270995 | 38270889 | 97.86         | - | U6 snRNA         |
| gj37550163 ref NT 022517.16 Hs3 22673 | Rfam       | 27247139 | 27247036 | 66            | - | U6 snRNA         |
| gj37550163 ref NT 022517.16 Hs3 22673 | Rfam       | 20489213 | 20489101 | 82.51         | - | U6 snRNA         |
| gj37550163 ref NT 022517.16 Hs3 22673 | Rfam       | 20250527 | 20250422 | 95.62         | - | U6 snRNA         |
| gj37550163 ref NT 022517.16 Hs3 22673 | Rfam       | 15414727 | 15414621 | 105.39        | - | U6 snRNA         |
| gj37550163 ref NT 022517.16 Hs3 22673 | Rfam       | 14512599 | 14512493 | 82.84         | - | U6 snRNA         |
| gj37550265 ref NT 029928.11 Hs3 30183 | Rfam       | 2241208  | 2241317  | 87.63         | + | U6 snRNA         |
| gj37550265 ref NT 029928.11 Hs3 30183 | Rfam       | 2341305  | 2341413  | 94.63         | + | U6 snRNA         |
| gj37550265 ref NT 029928.11 Hs3 30183 | Rfam/Blast | 1131691  | 1131585  | 120.53/100.00 | - | U6 snRNA         |
| gj37550265 ref NT 029928.11 Hs3 30183 | Rfam       | 1055563  | 1055464  | 82.56         | - | U6 snRNA         |
| gj37550265 ref NT 029928.11 Hs3 30183 | Rfam       | 740417   | 740315   | 73.56         | - | U6 snRNA         |
| gj37550867 ref NT 005612.14 Hs3 5769  | Rfam       | 5201378  | 5201439  | 33.22         | + | U7 snRNA         |
| gj37550867 ref NT 005612.14 Hs3 5769  | Rfam       | 49015204 | 49015264 | 40.03         | + | U7 snRNA         |
| gj37550867 ref NT 005612.14 Hs3 5769  | Rfam       | 76373882 | 76373942 | 46.18         | + | U7 snRNA         |
| gj37550867 ref NT 005612.14 Hs3 5769  | Rfam       | 69683213 | 69683151 | 37.56         | - | U7 snRNA         |
| gj37550867 ref NT 005612.14 Hs3 5769  | Rfam       | 66685363 | 66685292 | 36.98         | - | U7 snRNA         |
| gj37549731 ref NT 022459.13 Hs3 22615 | Rfam       | 6771648  | 6771712  | 38.42         | + | U7 snRNA         |
| gj37550163 ref NT 022517.16 Hs3 22673 | Rfam       | 17646459 | 17646521 | 34.78         | + | U7 snRNA         |
| gj37550163 ref NT 022517.16 Hs3 22673 | Rfam       | 48147411 | 48147471 | 42.86         | + | U7 snRNA         |
| gj37550163 ref NT 022517.16 Hs3 22673 | Rfam       | 37540330 | 37540268 | 34.93         | - | U7 snRNA         |
| gj37550163 ref NT 022517.16 Hs3 22673 | Rfam       | 4546584  | 4546525  | 29.15         | - | U7 snRNA         |
| gj37550265 ref NT 029928.11 Hs3 30183 | Rfam       | 419423   | 419485   | 50.46         | + | U7 snRNA         |
| gj37550867 ref NT 005612.14 Hs3 5769  | Rfam       | 89664803 | 89664934 | 59.62         | + | H/ACA box snoRNA |
| gj37550867 ref NT 005612.14 Hs3 5769  | Rfam       | 89666760 | 89666890 | 61.93         | + | H/ACA box snoRNA |
| gj37550867 ref NT 005612.14 Hs3 5769  | Rfam       | 92999270 | 92999392 | 83.66         | + | H/ACA box snoRNA |
| gj37550867 ref NT 005612.14 Hs3 5769  | Rfam/Blast | 93000247 | 93000378 | 104.04/100.00 | + | H/ACA box snoRNA |

|                                        |                   |                                                              |          |              |   |                  |
|----------------------------------------|-------------------|--------------------------------------------------------------|----------|--------------|---|------------------|
| gj 37550867 ref NT 005612.14 Hs3 5769  | Rfam              | 86755647                                                     | 86755783 | 27.76        | + | C/D box snoRNA   |
| gj 37550867 ref NT 005612.14 Hs3 5769  | Rfam              | 60220445                                                     | 60220309 | 33.4         | - | C/D box snoRNA   |
| gj 37550867 ref NT 005612.14 Hs3 5769  | Rfam              | 66909875                                                     | 66910006 | 95.5         | + | H/ACA box snoRNA |
| gj 37550867 ref NT 005612.14 Hs3 5769  | Rfam              | 78984353                                                     | 78984225 | 69.15        | - | H/ACA box snoRNA |
| gj 37550867 ref NT 005612.14 Hs3 5769  | Rfam              | 14788558                                                     | 14788691 | 93.47        | + | H/ACA box snoRNA |
| gj 37550867 ref NT 005612.14 Hs3 5769  | Rfam              | 17839330                                                     | 17839260 | 29.42        | - | C/D box snoRNA   |
| gj 37550163 ref NT 022517.16 Hs3 22673 | Rfam              | 37936521                                                     | 37936594 | 31.98        | + | miRNA            |
| gj 37550163 ref NT 022517.16 Hs3 22673 | Rfam              | 52251793                                                     | 52251704 | 38.54        | - | miRNA            |
| gj 37550867 ref NT 005612.14 Hs3 5769  | Rfam/Blast        | 66617691                                                     | 66617771 | 18.28/100.00 | + | miRNA            |
| gj 37550163 ref NT 022517.16 Hs3 22673 | Rfam              | 40205691                                                     | 40205824 | 27.06        | + | H/ACA box snoRNA |
| gj 37549731 ref NT 022459.13 Hs3 22615 | Rfam              | 19869054                                                     | 19869125 | 27.92        | + | C/D box snoRNA   |
| gj 37550867 ref NT 005612.14 Hs3 5769  | tRNAscan-SE/Sim4  | 75985176                                                     | 75985248 | 70.70/100    | + | tRNA             |
| gj 37550867 ref NT 005612.14 Hs3 5769  | tRNAscan-SE       | 90861253                                                     | 90861323 | 34.37        | - | tRNA             |
| gj 37550867 ref NT 005612.14 Hs3 5769  | tRNAscan-SE       | 44812217                                                     | 44812290 | 23.31        | - | tRNA             |
| gj 37550867 ref NT 005612.14 Hs3 5769  | tRNAscan-SE/Sim4  | 38445796                                                     | 38445867 | 75.37/100    | - | tRNA             |
| gj 37550867 ref NT 005612.14 Hs3 5769  | tRNAscan-SE/Sim4  | 38443098                                                     | 38443169 | 76.22/100    | - | tRNA             |
| gj 37550867 ref NT 005612.14 Hs3 5769  | tRNAscan-SE/Sim4  | 31908331                                                     | 31908402 | 22.67/100    | - | tRNA             |
| gj 37550867 ref NT 005612.14 Hs3 5769  | tRNAscan-SE/Sim4  | 13116024                                                     | 13116095 | 44.96/100    | - | tRNA             |
| gj 37550163 ref NT 022517.16 Hs3 22673 | tRNAscan-SE/Sim4  | 45656083                                                     | 45656155 | 61.06/100    | - | tRNA             |
| gj 37550163 ref NT 022517.16 Hs3 22673 | tRNAscan-SE       | 17681399                                                     | 17681465 | 28.15        | - | tRNA             |
| gj 37550867 ref NT 005612.14 Hs3 5769  | SRPscan           | 35805234                                                     | 35805857 | 309          | + | SRP RNA          |
| gj 37550163 ref NT 022517.16 Hs3 22673 | SRPscan           | 10082419                                                     | 10083042 | 318          | + | SRP RNA          |
| gj 37550867 ref NT 005612.14 Hs3 5769  | SRPscan           | 20029630                                                     | 20030253 | 316          | + | SRP RNA          |
| gj 37550163 ref NT 022517.16 Hs3 22673 | SRPscan           | 57918718                                                     | 57919341 | 304          | - | SRP RNA          |
| gj 29789894 ref NT 005535.15 Hs3 5692  | SRPscan           | 289430                                                       | 290053   | 374          | - | SRP RNA          |
| gj 37550867 ref NT 005612.14 Hs3 5769  | SRPscan           | 89992372                                                     | 89992995 | 370          | - | SRP RNA          |
| gj 37550867 ref NT 005612.14 Hs3 5769  | SRPscan           | 43803258                                                     | 43803881 | 364          | - | SRP RNA          |
| gj 37550163 ref NT 022517.16 Hs3 22673 | SRPscan           | 12388388                                                     | 12389011 | 360          | - | SRP RNA          |
| gj 37550265 ref NT 029928.11 Hs3 30183 | SRPscan           | 1162058                                                      | 1162681  | 342          | + | SRP RNA          |
| gj 37550163 ref NT 022517.16 Hs3 22673 | SRPscan           | 60522626                                                     | 60523249 | 334          | - | SRP RNA          |
| gj 29789894 ref NT 005535.15 Hs3 5692  | SRPscan           | 507177                                                       | 507800   | 334          | + | SRP RNA          |
| gj 37549731 ref NT 022459.13 Hs3 22615 | SRPscan           | 13662720                                                     | 13663343 | 318          | + | SRP RNA          |
| gj 37550163 ref NT 022517.16 Hs3 22673 | SRPscan           | 31887970                                                     | 31888593 | 314          | - | SRP RNA          |
| gj 29789894 ref NT 005535.15 Hs3 5692  | SRPscan           | 1079228                                                      | 1079851  | 310          | - | SRP RNA          |
| gj 37550163 ref NT 022517.16 Hs3 22673 | SRPscan           | 38386664                                                     | 38387287 | 300          | - | SRP RNA          |
| gj 37550867 ref NT 005612.14 Hs3 5769  | SRPscan           | 70997893                                                     | 70998516 | 549          | - | SRP RNA          |
| gj 37550867 ref NT 005612.14 Hs3 5769  | fisher            | 672007                                                       | 672237   | 98           | + | H/ACA box snoRNA |
| gj 37550867 ref NT 005612.14 Hs3 5769  | fisher            | 271441                                                       | 271695   | 96           | + | H/ACA box snoRNA |
| gj 37550867 ref NT 005612.14 Hs3 5769  | fisher            | 1844243                                                      | 1844469  | 98           | + | H/ACA box snoRNA |
| gj 37550867 ref NT 005612.14 Hs3 5769  | fisher            | 786109                                                       | 786331   | 98           | + | H/ACA box snoRNA |
| gj 37550867 ref NT 005612.14 Hs3 5769  | fisher            | 269254                                                       | 269478   | 98           | + | H/ACA box snoRNA |
| gj 37550867 ref NT 005612.14 Hs3 5769  | fisher            | 985381                                                       | 985612   | 98           | + | H/ACA box snoRNA |
| gj 37550867 ref NT 005612.14 Hs3 5769  | fisher            | 1140002                                                      | 1140206  | 98           | + | H/ACA box snoRNA |
| gj 37550867 ref NT 005612.14 Hs3 5769  | fisher            | 2369106                                                      | 2369324  | 98           | + | H/ACA box snoRNA |
| gj 37550867 ref NT 005612.14 Hs3 5769  | snoscan           | 924061                                                       | 924175   | 34.7         | - | C/D box snoRNA   |
| gj 37550867 ref NT 005612.14 Hs3 5769  | snoscan           | 41830485                                                     | 41830599 | 33.22        | - | C/D box snoRNA   |
| gj 37549731 ref NT 022459.13 Hs3 22615 | snoscan           | 2810715                                                      | 2810829  | 33.88        | - | C/D box snoRNA   |
| gj 37550163 ref NT 022517.16 Hs3 22673 | snoscan           | 33933981                                                     | 33934095 | 33.46        | - | C/D box snoRNA   |
| gj 37550163 ref NT 022517.16 Hs3 22673 | snoscan           | 33537475                                                     | 33537589 | 33.57        | - | C/D box snoRNA   |
| gj 37550867 ref NT 005612.14 Hs3 5769  | snoscan           | 49861976                                                     | 49862079 | 33.89        | - | C/D box snoRNA   |
| gj 37550867 ref NT 005612.14 Hs3 5769  | snoscan           | 74938025                                                     | 74938131 | 30.06        | - | C/D box snoRNA   |
| gj 37550163 ref NT 022517.16 Hs3 22673 | snoscan           | 47009410                                                     | 47009526 | 30.55        | - | C/D box snoRNA   |
| gj 37550867 ref NT 005612.14 Hs3 5769  | snoscan           | 69003576                                                     | 69003680 | 30.34        | - | C/D box snoRNA   |
| gj 37549731 ref NT 022459.13 Hs3 22615 | snoscan           | 21033320                                                     | 21033424 | 30.34        | - | C/D box snoRNA   |
| gj 37550867 ref NT 005612.14 Hs3 5769  | snoscan           | 33830365                                                     | 33830485 | 31.27        | - | C/D box snoRNA   |
| gj 37550163 ref NT 022517.16 Hs3 22673 | snoscan           | 3722685                                                      | 3722805  | 31.27        | - | C/D box snoRNA   |
| gj 37550163 ref NT 022517.16 Hs3 22673 | snoscan           | 24648289                                                     | 24648392 | 33.42        | - | C/D box snoRNA   |
| gj 37550163 ref NT 022517.16 Hs3 22673 | snoscan           | 64182756                                                     | 64182860 | 30.37        | - | C/D box snoRNA   |
| gj 37550867 ref NT 005612.14 Hs3 5769  | snoscan           | 83398245                                                     | 83398349 | 30.37        | - | C/D box snoRNA   |
| gj 37550867 ref NT 005612.14 Hs3 5769  | snoscan           | 87071341                                                     | 87071445 | 30.33        | - | C/D box snoRNA   |
| gj 37550867 ref NT 005612.14 Hs3 5769  | snoscan           | 61190180                                                     | 61190280 | 30.33        | - | C/D box snoRNA   |
| gj 37550265 ref NT 029928.11 Hs3 30183 | Unigene Screening | ( 2524001..2524368 )                                         |          | 94           | + | mRNA-like        |
| gj 37550163 ref NT 022517.16 Hs3 22673 | Unigene Screening | ( 23809538..23810260 )                                       |          | 100          | + | mRNA-like        |
| gj 37550867 ref NT 005612.14 Hs3 5769  | Unigene Screening | ( 58521264..58522031 )                                       |          | 98           | - | mRNA-like        |
| gj 37550163 ref NT 022517.16 Hs3 22673 | Unigene Screening | ( 33571351..33572037 )                                       |          | 100          | - | mRNA-like        |
| gj 37550867 ref NT 005612.14 Hs3 5769  | Unigene Screening | ( 27637430..27638028 )                                       |          | 100          | + | mRNA-like        |
| gj 37550265 ref NT 029928.11 Hs3 30183 | Unigene Screening | ( 2560901..2561612 )                                         |          | 100          | + | mRNA-like        |
| gj 37550867 ref NT 005612.14 Hs3 5769  | Unigene Screening | ( 52272527..52272802, 52272940..52274620 )                   |          | 93           | - | mRNA-like        |
| gj 37550163 ref NT 022517.16 Hs3 22673 | Unigene Screening | ( 29847004..29847560 )                                       |          | 88           | - | mRNA-like        |
| gj 37550867 ref NT 005612.14 Hs3 5769  | Unigene Screening | ( 37688766..37689426 )                                       |          | 100          | + | mRNA-like        |
| gj 37550867 ref NT 005612.14 Hs3 5769  | Unigene Screening | 17414082..17414193, 17414246..17415072, 17415126..17415435 ) |          | 90           | + | mRNA-like        |
| gj 37550867 ref NT 005612.14 Hs3 5769  | Unigene Screening | ( 37669126..37671309 )                                       |          | 100          | - | mRNA-like        |
| gj 37550867 ref NT 005612.14 Hs3 5769  | Unigene Screening | ( 31580528..31581151 )                                       |          | 85           | + | mRNA-like        |
| gj 37550867 ref NT 005612.14 Hs3 5769  | Unigene Screening | ( 100052573..100053070 )                                     |          | 100          | + | mRNA-like        |
| gj 37550867 ref NT 005612.14 Hs3 5769  | Unigene Screening | ( 28062107..28062646 )                                       |          | 100          | + | mRNA-like        |
| gj 37550163 ref NT 022517.16 Hs3 22673 | Unigene Screening | ( 26698009..26698688 )                                       |          | 100          | + | mRNA-like        |
| gj 37549731 ref NT 022459.13 Hs3 22615 | Unigene Screening | ( 4753718..4754333 )                                         |          | 100          | + | mRNA-like        |
| gj 37550265 ref NT 029928.11 Hs3 30183 | Unigene Screening | ( 2558716..2559299 )                                         |          | 84           | + | mRNA-like        |
| gj 37550867 ref NT 005612.14 Hs3 5769  | Unigene Screening | ( 58568468..58569177 )                                       |          | 100          | - | mRNA-like        |

|                                       |                   |                                                                                    |  |     |   |           |
|---------------------------------------|-------------------|------------------------------------------------------------------------------------|--|-----|---|-----------|
| gj37550867 ref NT 005612.14 Hs3 5769  | Unigene Screening | ( 21005678..21006170, 21015094..21015170 )                                         |  | 100 | + | mRNA-like |
| gj37550265 ref NT 029928.11 Hs3 30183 | Unigene Screening | ( 2555354..25558660 )                                                              |  | 87  | - | mRNA-like |
| gj37550867 ref NT 005612.14 Hs3 5769  | Unigene Screening | ( 27638255..27638755 )                                                             |  | 100 | - | mRNA-like |
| gj37550867 ref NT 005612.14 Hs3 5769  | Unigene Screening | ( 21279641..21280425 )                                                             |  | 84  | - | mRNA-like |
| gj37550867 ref NT 005612.14 Hs3 5769  | Unigene Screening | ( 76303596..76304423 )                                                             |  | 100 | - | mRNA-like |
| gj37550867 ref NT 005612.14 Hs3 5769  | Unigene Screening | ( 46785702..46786620, 46786702..46789225 )                                         |  | 98  | + | mRNA-like |
| gj37550163 ref NT 022517.16 Hs3 22673 | Unigene Screening | ( 23305655..23306247 )                                                             |  | 100 | - | mRNA-like |
| gj37550163 ref NT 022517.16 Hs3 22673 | Unigene Screening | ( 23850710..23851203 )                                                             |  | 100 | - | mRNA-like |
| gj37550867 ref NT 005612.14 Hs3 5769  | Unigene Screening | ( 45352399..45352433, 62999073..62999805 )                                         |  | 92  | + | mRNA-like |
| gj37550867 ref NT 005612.14 Hs3 5769  | Unigene Screening | ( 58528050..58528595 )                                                             |  | 100 | - | mRNA-like |
| gj37550163 ref NT 022517.16 Hs3 22673 | Sim4              | ( 36790267..36792274 )                                                             |  | 100 | - | mRNA-like |
| gj37550163 ref NT 022517.16 Hs3 22673 | Sim4              | ( 44807741..44807770, 44882345..44884082 )                                         |  | 100 | - | mRNA-like |
| gj37550867 ref NT 005612.14 Hs3 5769  | Sim4              | ( 74275348..74277209 )                                                             |  | 100 | - | mRNA-like |
| gj37550265 ref NT 029928.11 Hs3 30183 | Sim4              | ( 1388091..1388341, 1392116..1394125 )                                             |  | 100 | - | mRNA-like |
| gj37550867 ref NT 005612.14 Hs3 5769  | Sim4              | ( 3974020..3975520 )                                                               |  | 100 | + | mRNA-like |
| gj37550163 ref NT 022517.16 Hs3 22673 | Sim4              | ( 32452780..32454129 )                                                             |  | 100 | + | mRNA-like |
| gj37550867 ref NT 005612.14 Hs3 5769  | Sim4              | ( 20546077..20547789 )                                                             |  | 100 | - | mRNA-like |
| gj37549731 ref NT 022459.13 Hs3 22615 | Sim4              | ( 6806111..6807157 )                                                               |  | 100 | + | mRNA-like |
| gj37550867 ref NT 005612.14 Hs3 5769  | Sim4              | ( 67396469..67398100 )                                                             |  | 100 | + | mRNA-like |
| gj37550867 ref NT 005612.14 Hs3 5769  | Sim4              | ( 81560533..81562154 )                                                             |  | 100 | + | mRNA-like |
| gj37550163 ref NT 022517.16 Hs3 22673 | Sim4              | ( 49695864..49697354 )                                                             |  | 100 | - | mRNA-like |
| gj37549731 ref NT 022459.13 Hs3 22615 | Sim4              | ( 8006410..8007334 )                                                               |  | 100 | - | mRNA-like |
| gj37550163 ref NT 022517.16 Hs3 22673 | Sim4              | ( 57467848..57470029 )                                                             |  | 100 | + | mRNA-like |
| gj37550265 ref NT 029928.11 Hs3 30183 | Sim4              | ( 580974..583955 )                                                                 |  | 100 | - | mRNA-like |
| gj37550867 ref NT 005612.14 Hs3 5769  | Sim4              | ( 42717749..42719705 )                                                             |  | 100 | - | mRNA-like |
| gj37550867 ref NT 005612.14 Hs3 5769  | Sim4              | ( 75027256..75030013 )                                                             |  | 100 | + | mRNA-like |
| gj37550867 ref NT 005612.14 Hs3 5769  | Sim4              | ( 32234912..32236294 )                                                             |  | 100 | - | mRNA-like |
| gj37550163 ref NT 022517.16 Hs3 22673 | Sim4              | ( 45646627..45648346 )                                                             |  | 100 | + | mRNA-like |
| gj37550163 ref NT 022517.16 Hs3 22673 | Sim4              | ( 55835468..55837517 )                                                             |  | 100 | - | mRNA-like |
| gj37550163 ref NT 022517.16 Hs3 22673 | Sim4              | ( 30679118..30680802 )                                                             |  | 100 | + | mRNA-like |
| gj37550867 ref NT 005612.14 Hs3 5769  | Sim4              | ( 78437677..78439253 )                                                             |  | 100 | + | mRNA-like |
| gj37550265 ref NT 029928.11 Hs3 30183 | Sim4              | ( 2548281..2549983 )                                                               |  | 100 | + | mRNA-like |
| gj37550867 ref NT 005612.14 Hs3 5769  | Sim4              | ( 35381825..35383312 )                                                             |  | 100 | - | mRNA-like |
| gj37549731 ref NT 022459.13 Hs3 22615 | Sim4              | ( 7236842..7238605 )                                                               |  | 100 | - | mRNA-like |
| gj37550867 ref NT 005612.14 Hs3 5769  | Sim4              | ( 11994671..11996493, 11997624..11998161 )                                         |  | 100 | - | mRNA-like |
| gj37550867 ref NT 005612.14 Hs3 5769  | Sim4              | ( 82020733..82022456 )                                                             |  | 100 | + | mRNA-like |
| gj37550867 ref NT 005612.14 Hs3 5769  | Sim4              | ( 17311461..17312921 )                                                             |  | 100 | + | mRNA-like |
| gj37550867 ref NT 005612.14 Hs3 5769  | Sim4              | ( 45822560..45824529 )                                                             |  | 100 | - | mRNA-like |
| gj37550867 ref NT 005612.14 Hs3 5769  | Sim4              | ( 99884088..99885815 )                                                             |  | 100 | + | mRNA-like |
| gj37550867 ref NT 005612.14 Hs3 5769  | Sim4              | ( 48676483..48678137 )                                                             |  | 100 | - | mRNA-like |
| gj37550867 ref NT 005612.14 Hs3 5769  | Sim4              | ( 20845404..20846723 )                                                             |  | 100 | - | mRNA-like |
| gj37550163 ref NT 022517.16 Hs3 22673 | Sim4              | ( 61711805..61713542 )                                                             |  | 100 | + | mRNA-like |
| gj37550867 ref NT 005612.14 Hs3 5769  | Sim4              | ( 3667626..3669842 )                                                               |  | 100 | + | mRNA-like |
| gj37550163 ref NT 022517.16 Hs3 22673 | Sim4              | ( 65818889..65820985 )                                                             |  | 100 | - | mRNA-like |
| gj37550163 ref NT 022517.16 Hs3 22673 | Sim4              | ( 19945270..19946915 )                                                             |  | 100 | + | mRNA-like |
| gj37550163 ref NT 022517.16 Hs3 22673 | Sim4              | ( 41825614..41828184 )                                                             |  | 100 | - | mRNA-like |
| gj37550867 ref NT 005612.14 Hs3 5769  | Sim4              | ( 99828662..99831432 )                                                             |  | 100 | + | mRNA-like |
| gj37550163 ref NT 022517.16 Hs3 22673 | Sim4              | ( 64648545..64650593 )                                                             |  | 100 | + | mRNA-like |
| gj37550867 ref NT 005612.14 Hs3 5769  | Sim4              | ( 85388606..85391026 )                                                             |  | 100 | + | mRNA-like |
| gj37550867 ref NT 005612.14 Hs3 5769  | Sim4              | ( 4796501..4798320 )                                                               |  | 100 | - | mRNA-like |
| gj37550163 ref NT 022517.16 Hs3 22673 | Sim4              | ( 23420130..23422242 )                                                             |  | 100 | - | mRNA-like |
| gj37550163 ref NT 022517.16 Hs3 22673 | Sim4              | ( 643918..646120 )                                                                 |  | 100 | + | mRNA-like |
| gj37550163 ref NT 022517.16 Hs3 22673 | Sim4              | ( 48363800..48365826 )                                                             |  | 100 | - | mRNA-like |
| gj37550867 ref NT 005612.14 Hs3 5769  | Sim4              | ( 20895171..20897083 )                                                             |  | 100 | - | mRNA-like |
| gj37550163 ref NT 022517.16 Hs3 22673 | Sim4              | ( 9951657..9954146 )                                                               |  | 100 | + | mRNA-like |
| gj37550867 ref NT 005612.14 Hs3 5769  | Sim4              | ( 92001684..92003451 )                                                             |  | 100 | - | mRNA-like |
| gj37549731 ref NT 022459.13 Hs3 22615 | Sim4              | ( 5313602..5315811 )                                                               |  | 100 | - | mRNA-like |
| gj37549731 ref NT 022459.13 Hs3 22615 | Sim4              | ( 7281644..7283680 )                                                               |  | 100 | - | mRNA-like |
| gj37550163 ref NT 022517.16 Hs3 22673 | Sim4              | ( 24436592..24436887, 24439433..24440890 )                                         |  | 100 | - | mRNA-like |
| gj37550163 ref NT 022517.16 Hs3 22673 | Sim4              | ( 29634764..29637401 )                                                             |  | 100 | + | mRNA-like |
| gj37550163 ref NT 022517.16 Hs3 22673 | Sim4              | ( 37239250..37241215 )                                                             |  | 100 | + | mRNA-like |
| gj37550163 ref NT 022517.16 Hs3 22673 | Sim4              | ( 17177267..17179584 )                                                             |  | 100 | - | mRNA-like |
| gj37550867 ref NT 005612.14 Hs3 5769  | Sim4              | ( 91696678..91698590 )                                                             |  | 100 | - | mRNA-like |
| gj37549731 ref NT 022459.13 Hs3 22615 | Sim4              | ( 4895459..4897200 )                                                               |  | 100 | - | mRNA-like |
| gj37550867 ref NT 005612.14 Hs3 5769  | Sim4              | ( 76353558..76355116 )                                                             |  | 100 | - | mRNA-like |
| gj37550163 ref NT 022517.16 Hs3 22673 | Sim4              | ( 43678765..43680414 )                                                             |  | 100 | + | mRNA-like |
| gj37550867 ref NT 005612.14 Hs3 5769  | Sim4              | ( 78384963..78386605 )                                                             |  | 100 | + | mRNA-like |
| gj37550867 ref NT 005612.14 Hs3 5769  | Sim4              | ( 19932987..19935918 )                                                             |  | 100 | - | mRNA-like |
| gj37550867 ref NT 005612.14 Hs3 5769  | Sim4              | ( 85612160..85614155 )                                                             |  | 100 | - | mRNA-like |
| gj37550163 ref NT 022517.16 Hs3 22673 | Sim4              | ( 14659690..14661746 )                                                             |  | 100 | + | mRNA-like |
| gj37550163 ref NT 022517.16 Hs3 22673 | Sim4              | ( 3824098..3826139 )                                                               |  | 100 | - | mRNA-like |
| gj37550867 ref NT 005612.14 Hs3 5769  | Sim4              | ( 64865145..64865193, 64866257..64866414, 64867494..64867578, 64868752..64870465 ) |  | 100 | + | mRNA-like |
| gj37550867 ref NT 005612.14 Hs3 5769  | Sim4              | ( 15540846..15542017, 15542883..15544325, 15544340..15544753 )                     |  | 100 | - | mRNA-like |

|                                        |      |                                                                                                                            |     |   |           |
|----------------------------------------|------|----------------------------------------------------------------------------------------------------------------------------|-----|---|-----------|
| gi 37550867 ref NT_005612.14 Hs3_5769  | Sim4 | ( 87823492..87823691, 87823807..87823875, 87912544..87912829, 87928131..87928238, 87952515..87954176 )                     | 100 | + | mRNA-like |
| gi 37549731 ref NT_022459.13 Hs3_22615 | Sim4 | ( 2731235..2733480 )                                                                                                       | 100 | - | mRNA-like |
| gi 37550163 ref NT_022517.16 Hs3_22673 | Sim4 | ( 15421764..15424123 )                                                                                                     | 100 | + | mRNA-like |
| gi 37550867 ref NT_005612.14 Hs3_5769  | Sim4 | ( 20978260..20980107 )                                                                                                     | 100 | - | mRNA-like |
| gi 37550867 ref NT_005612.14 Hs3_5769  | Sim4 | ( 94943929..94945662 )                                                                                                     | 100 | + | mRNA-like |
| gi 37550163 ref NT_022517.16 Hs3_22673 | Sim4 | ( 14446117..14447777 )                                                                                                     | 100 | + | mRNA-like |
| gi 37550163 ref NT_022517.16 Hs3_22673 | Sim4 | ( 17445465..17447864 )                                                                                                     | 100 | - | mRNA-like |
| gi 37550163 ref NT_022517.16 Hs3_22673 | Sim4 | ( 48709756..48712683 )                                                                                                     | 100 | - | mRNA-like |
| gi 37550163 ref NT_022517.16 Hs3_22673 | Sim4 | ( 65855973..65856234, 65864771..65866288 )                                                                                 | 100 | - | mRNA-like |
| gi 37550163 ref NT_022517.16 Hs3_22673 | Sim4 | ( 58816762..58819570 )                                                                                                     | 100 | - | mRNA-like |
| gi 37550867 ref NT_005612.14 Hs3_5769  | Sim4 | ( 89894911..89897460 )                                                                                                     | 100 | + | mRNA-like |
| gi 37550163 ref NT_022517.16 Hs3_22673 | Sim4 | ( 20149901..20152112 )                                                                                                     | 100 | - | mRNA-like |
| gi 37549731 ref NT_022459.13 Hs3_22615 | Sim4 | ( 23223356..23225970 )                                                                                                     | 100 | + | mRNA-like |
| gi 37550163 ref NT_022517.16 Hs3_22673 | Sim4 | ( 43696152..43700524 )                                                                                                     | 100 | + | mRNA-like |
| gi 37550163 ref NT_022517.16 Hs3_22673 | Sim4 | ( 11237536..11238955 )                                                                                                     | 100 | + | mRNA-like |
| gi 37550163 ref NT_022517.16 Hs3_22673 | Sim4 | ( 15845549..15847174 )                                                                                                     | 100 | + | mRNA-like |
| gi 37550163 ref NT_022517.16 Hs3_22673 | Sim4 | ( 28263142..28265018 )                                                                                                     | 100 | + | mRNA-like |
| gi 37550163 ref NT_022517.16 Hs3_22673 | Sim4 | ( 31881584..31883247 )                                                                                                     | 100 | - | mRNA-like |
| gi 37549731 ref NT_022459.13 Hs3_22615 | Sim4 | ( 4821616..4821659, 5186245..5186465, 5189260..5191942 )                                                                   | 100 | - | mRNA-like |
| gi 37550867 ref NT_005612.14 Hs3_5769  | Sim4 | ( 78253994..78255913, 92048704..92048791 )                                                                                 | 100 | + | mRNA-like |
| gi 37550867 ref NT_005612.14 Hs3_5769  | Sim4 | ( 71362940..71364739, 71370849..71371008 )                                                                                 | 100 | - | mRNA-like |
| gi 37550867 ref NT_005612.14 Hs3_5769  | Sim4 | ( 94374872..94376913 )                                                                                                     | 100 | + | mRNA-like |
| gi 37550163 ref NT_022517.16 Hs3_22673 | Sim4 | ( 37069615..37071403 )                                                                                                     | 100 | - | mRNA-like |
| gi 37550867 ref NT_005612.14 Hs3_5769  | Sim4 | ( 55558349..55558369, 55730176..55731904 )                                                                                 | 100 | - | mRNA-like |
| gi 37550867 ref NT_005612.14 Hs3_5769  | Sim4 | ( 47826903..47829335, 47883138..47883161 )                                                                                 | 100 | + | mRNA-like |
| gi 37550163 ref NT_022517.16 Hs3_22673 | Sim4 | ( 31434956..31435139, 31435159..31435499, 33764732..33764754, 33764795..33764817 )                                         | 100 | + | mRNA-like |
| gi 37550867 ref NT_005612.14 Hs3_5769  | Sim4 | ( 55914456..55915022, 55941859..55941881 )                                                                                 | 100 | + | mRNA-like |
| gi 37550867 ref NT_005612.14 Hs3_5769  | Sim4 | ( 76207360..76209408 )                                                                                                     | 100 | + | mRNA-like |
| gi 37550163 ref NT_022517.16 Hs3_22673 | Sim4 | ( 35480232..35480257, 38418151..38420341, 38421619..38421936 )                                                             | 100 | - | mRNA-like |
| gi 37550867 ref NT_005612.14 Hs3_5769  | Sim4 | ( 82632465..82632491, 83233699..83235965 )                                                                                 | 100 | - | mRNA-like |
| gi 37549731 ref NT_022459.13 Hs3_22615 | Sim4 | ( 5248733..5248747, 5313584..5316145, 5316810..5317772 )                                                                   | 100 | - | mRNA-like |
| gi 37550867 ref NT_005612.14 Hs3_5769  | Sim4 | ( 4751868..4751884, 4752897..4752909, 4753067..4753093, 26608273..26609915 )                                               | 100 | - | mRNA-like |
| gi 37550867 ref NT_005612.14 Hs3_5769  | Sim4 | ( 29690208..29690233, 29826301..29827895 )                                                                                 | 100 | - | mRNA-like |
| gi 37550867 ref NT_005612.14 Hs3_5769  | Sim4 | ( 67665253..67665286, 78001538..78002483, 78002594..78002649, 78002789..78002905, 78023347..78023662, 78023837..78023898 ) | 100 | - | mRNA-like |
| gi 37550867 ref NT_005612.14 Hs3_5769  | Sim4 | ( 19711704..19712973 )                                                                                                     | 100 | - | mRNA-like |
| gi 37550867 ref NT_005612.14 Hs3_5769  | Sim4 | ( 39802950..39804259, 40477673..40477703 )                                                                                 | 100 | + | mRNA-like |
| gi 37550867 ref NT_005612.14 Hs3_5769  | Sim4 | ( 28634781..28634796, 28634955..28634967, 28635406..28635428, 33903064..33904267 )                                         | 100 | - | mRNA-like |
| gi 37550867 ref NT_005612.14 Hs3_5769  | Sim4 | ( 15350707..15350734, 15350837..15350889, 15362246..15364116 )                                                             | 100 | + | mRNA-like |
| gi 37550867 ref NT_005612.14 Hs3_5769  | Sim4 | ( 28634780..28634796, 28634955..28634967, 28635406..28635430, 58478518..58480722 )                                         | 100 | - | mRNA-like |
| gi 37550867 ref NT_005612.14 Hs3_5769  | Sim4 | ( 7779618..7780430, 15544288..15544341, 15545265..15545275, 15545544..15545558, 15547350..15547372 )                       | 100 | + | mRNA-like |
| gi 37550265 ref NT_029928.11 Hs3_30183 | Sim4 | ( 883107..883419, 1505070..1505092, 1505250..1505262 )                                                                     | 100 | + | mRNA-like |
| gi 37550867 ref NT_005612.14 Hs3_5769  | Sim4 | ( 59052333..59054381, 90365958..90365995, 90366260..90366279 )                                                             | 100 | + | mRNA-like |
| gi 37550867 ref NT_005612.14 Hs3_5769  | Sim4 | ( 25629630..25632692, 25709219..25709249 )                                                                                 | 100 | + | mRNA-like |
| gi 37550163 ref NT_022517.16 Hs3_22673 | Sim4 | ( 62876017..62877349 )                                                                                                     | 100 | - | mRNA-like |
| gi 37550163 ref NT_022517.16 Hs3_22673 | Sim4 | ( 14109276..14110817 )                                                                                                     | 100 | + | mRNA-like |
| gi 37550163 ref NT_022517.16 Hs3_22673 | Sim4 | ( 44407993..44408274, 44410990..44412538 )                                                                                 | 100 | - | mRNA-like |
| gi 37550867 ref NT_005612.14 Hs3_5769  | Sim4 | ( 14532181..14535105 )                                                                                                     | 100 | + | mRNA-like |
| gi 37549731 ref NT_022459.13 Hs3_22615 | Sim4 | ( 4700538..4702387 )                                                                                                       | 100 | - | mRNA-like |
| gi 37550867 ref NT_005612.14 Hs3_5769  | Sim4 | ( 35960339..35962550, 35962816..35963684 )                                                                                 | 100 | - | mRNA-like |
| gi 37550867 ref NT_005612.14 Hs3_5769  | Sim4 | ( 25705534..25705567, 25706275..25708700, 25709219..25709252 )                                                             | 100 | + | mRNA-like |
| gi 37550163 ref NT_022517.16 Hs3_22673 | Sim4 | ( 12390373..12391120, 12391136..12391923, 33764740..33764753, 33764795..33764817 )                                         | 100 | + | mRNA-like |

|                                        |      |                                                                                                                                                                               |     |   |           |
|----------------------------------------|------|-------------------------------------------------------------------------------------------------------------------------------------------------------------------------------|-----|---|-----------|
| gi 37550163 ref NT_022517.16 Hs3_22673 | Sim4 | (45625621..45625655,45791076..45793092 )                                                                                                                                      | 100 | - | mRNA-like |
| gi 37550163 ref NT_022517.16 Hs3_22673 | Sim4 | (33124086..33126035,33764743..33764753,33764795..33764815 )                                                                                                                   | 100 | + | mRNA-like |
| gi 37550867 ref NT_005612.14 Hs3_5769  | Sim4 | (28942316..28944829,35378211..35378246,35378401..35378415 )                                                                                                                   | 100 | + | mRNA-like |
| gi 37550867 ref NT_005612.14 Hs3_5769  | Sim4 | (90410496..90412348 )                                                                                                                                                         | 100 | + | mRNA-like |
| gi 37549731 ref NT_022459.13 Hs3_22615 | Sim4 | (4712164..4714513 )                                                                                                                                                           | 100 | - | mRNA-like |
| gi 37550867 ref NT_005612.14 Hs3_5769  | Sim4 | (18110952..18114821 )                                                                                                                                                         | 100 | + | mRNA-like |
| gi 37550163 ref NT_022517.16 Hs3_22673 | Sim4 | (15051586..15053330 )                                                                                                                                                         | 100 | - | mRNA-like |
| gi 37550163 ref NT_022517.16 Hs3_22673 | Sim4 | (42882859..42884724 )                                                                                                                                                         | 100 | + | mRNA-like |
| gi 37550163 ref NT_022517.16 Hs3_22673 | Sim4 | (21876970..21879040 )                                                                                                                                                         | 100 | - | mRNA-like |
| gi 37550163 ref NT_022517.16 Hs3_22673 | Sim4 | (63918569..63918778,63918892..63921302 )                                                                                                                                      | 100 | - | mRNA-like |
| gi 37550163 ref NT_022517.16 Hs3_22673 | Sim4 | (61474285..61475977 )                                                                                                                                                         | 100 | + | mRNA-like |
| gi 37550163 ref NT_022517.16 Hs3_22673 | Sim4 | (8553468..8555580 )                                                                                                                                                           | 100 | + | mRNA-like |
| gi 37550867 ref NT_005612.14 Hs3_5769  | Sim4 | (25883527..25885539 )                                                                                                                                                         | 100 | - | mRNA-like |
| gi 37550867 ref NT_005612.14 Hs3_5769  | Sim4 | (6393557..6395720 )                                                                                                                                                           | 100 | + | mRNA-like |
| gi 37550265 ref NT_029928.11 Hs3_30183 | Sim4 | (295794..298667 )                                                                                                                                                             | 100 | - | mRNA-like |
| gi 37550867 ref NT_005612.14 Hs3_5769  | Sim4 | (42943903..42946671,42955531..42955622,42958831..42958902,42962004..42962035 )                                                                                                | 100 | - | mRNA-like |
| gi 37550867 ref NT_005612.14 Hs3_5769  | Sim4 | (85838524..85840592 )                                                                                                                                                         | 100 | + | mRNA-like |
| gi 37550867 ref NT_005612.14 Hs3_5769  | Sim4 | (67289884..67291845 )                                                                                                                                                         | 100 | + | mRNA-like |
| gi 37550867 ref NT_005612.14 Hs3_5769  | Sim4 | (30358786..30360867 )                                                                                                                                                         | 100 | + | mRNA-like |
| gi 37550163 ref NT_022517.16 Hs3_22673 | Sim4 | (10813370..10815477 )                                                                                                                                                         | 100 | + | mRNA-like |
| gi 37550163 ref NT_022517.16 Hs3_22673 | Sim4 | (43335786..43337985 )                                                                                                                                                         | 100 | - | mRNA-like |
| gi 37550163 ref NT_022517.16 Hs3_22673 | Sim4 | (23903711..23905829 )                                                                                                                                                         | 100 | + | mRNA-like |
| gi 37550867 ref NT_005612.14 Hs3_5769  | Sim4 | (83507388..83507443,83534375..83536364 )                                                                                                                                      | 100 | + | mRNA-like |
| gi 37550163 ref NT_022517.16 Hs3_22673 | Sim4 | (46822918..46824580 )                                                                                                                                                         | 100 | - | mRNA-like |
| gi 37550163 ref NT_022517.16 Hs3_22673 | Sim4 | (12569485..12571279 )                                                                                                                                                         | 100 | - | mRNA-like |
| gi 37550867 ref NT_005612.14 Hs3_5769  | Sim4 | (97608338..97611616 )                                                                                                                                                         | 100 | + | mRNA-like |
| gi 37550867 ref NT_005612.14 Hs3_5769  | Sim4 | (66708880..66710657 )                                                                                                                                                         | 100 | - | mRNA-like |
| gi 37549731 ref NT_022459.13 Hs3_22615 | Sim4 | (5895275..5895436,5903379..5903485,5915927..5918350 )                                                                                                                         | 100 | + | mRNA-like |
| gi 37550163 ref NT_022517.16 Hs3_22673 | Sim4 | (49230042..49232450 )                                                                                                                                                         | 100 | - | mRNA-like |
| gi 37550867 ref NT_005612.14 Hs3_5769  | Sim4 | (85232993..85235244 )                                                                                                                                                         | 100 | - | mRNA-like |
| gi 37550867 ref NT_005612.14 Hs3_5769  | Sim4 | (84029809..84029942,84108559..84108722,84109510..84112170 )                                                                                                                   | 100 | + | mRNA-like |
| gi 37549731 ref NT_022459.13 Hs3_22615 | Sim4 | (10535811..10536884,1061661..1063640 )                                                                                                                                        | 100 | + | mRNA-like |
| gi 37550867 ref NT_005612.14 Hs3_5769  | Sim4 | (62960295..62963361,62964042..62964130,63029834..63029960 )                                                                                                                   | 100 | - | mRNA-like |
| gi 37549731 ref NT_022459.13 Hs3_22615 | Sim4 | (14315121..14316898 )                                                                                                                                                         | 100 | - | mRNA-like |
| gi 37550163 ref NT_022517.16 Hs3_22673 | Sim4 | (4878493..4880384,4882226..4882382,4931244..4931383,4961480..4961646 )                                                                                                        | 100 | - | mRNA-like |
| gi 37550867 ref NT_005612.14 Hs3_5769  | Sim4 | (89660597..89660893,89665024..89665458,89666958..89667039,89668145..89668571 )                                                                                                | 100 | + | mRNA-like |
| gi 37550867 ref NT_005612.14 Hs3_5769  | Sim4 | (31195253..31197278 )                                                                                                                                                         | 100 | - | mRNA-like |
| gi 37550163 ref NT_022517.16 Hs3_22673 | Sim4 | (42743951..42745825 )                                                                                                                                                         | 100 | - | mRNA-like |
| gi 37549731 ref NT_022459.13 Hs3_22615 | Sim4 | (14152211..1417399 )                                                                                                                                                          | 100 | + | mRNA-like |
| gi 37550163 ref NT_022517.16 Hs3_22673 | Sim4 | (49160229..49161909 )                                                                                                                                                         | 100 | + | mRNA-like |
| gi 37550867 ref NT_005612.14 Hs3_5769  | Sim4 | (76209416..76211317 )                                                                                                                                                         | 100 | + | mRNA-like |
| gi 37550163 ref NT_022517.16 Hs3_22673 | Sim4 | (40256211..40256757,40256821..40258310,40268320..40268479,40276406..40276562 )                                                                                                | 100 | - | mRNA-like |
| gi 37550163 ref NT_022517.16 Hs3_22673 | Sim4 | (15395885..15396425,15397009..15397094,15397283..15397453,15406466..15406600,15407798..15408146,15408913..15409043 )                                                          | 100 | - | mRNA-like |
| gi 37550867 ref NT_005612.14 Hs3_5769  | Sim4 | (65731429..65733039 )                                                                                                                                                         | 100 | + | mRNA-like |
| gi 37550163 ref NT_022517.16 Hs3_22673 | Sim4 | (64593116..64593352,64707479..64707759,64717808..64717864,64775181..64775270,64881825..64883549 )                                                                             | 100 | + | mRNA-like |
| gi 37550163 ref NT_022517.16 Hs3_22673 | Sim4 | (11543391..11545703 )                                                                                                                                                         | 100 | - | mRNA-like |
| gi 37550163 ref NT_022517.16 Hs3_22673 | Sim4 | (9786718..9788777,24224520..24224549 )                                                                                                                                        | 100 | + | mRNA-like |
| gi 37550867 ref NT_005612.14 Hs3_5769  | Sim4 | (91026513..91028784,93080257..93080275,93080425..93080435 )                                                                                                                   | 100 | + | mRNA-like |
| gi 37550867 ref NT_005612.14 Hs3_5769  | Sim4 | (8154849..8155015,8174352..8174452,8208551..8208887,8210471..8211916 )                                                                                                        | 100 | + | mRNA-like |
| gi 37550163 ref NT_022517.16 Hs3_22673 | Sim4 | (14038569..14040175,14049871..14050010,14060587..14060704,14061801..14062124 )                                                                                                | 100 | - | mRNA-like |
| gi 37550867 ref NT_005612.14 Hs3_5769  | Sim4 | (97480116..97481388,97488199..97488292,97489754..97489791,97491019..97491117,97495034..97495260,97517439..97517495,97528983..97529386,97541578..97541656,97543361..97543483 ) | 100 | - | mRNA-like |
| gi 37550163 ref NT_022517.16 Hs3_22673 | Sim4 | (42884505..42886417 )                                                                                                                                                         | 100 | + | mRNA-like |
| gi 37550867 ref NT_005612.14 Hs3_5769  | Sim4 | (28156108..28158180 )                                                                                                                                                         | 100 | + | mRNA-like |
| gi 37550163 ref NT_022517.16 Hs3_22673 | Sim4 | (42883623..42886417 )                                                                                                                                                         | 100 | + | mRNA-like |
| gi 37550265 ref NT_029928.11 Hs3_30183 | Sim4 | (36683..38426 )                                                                                                                                                               | 100 | + | mRNA-like |
| gi 37549731 ref NT_022459.13 Hs3_22615 | Sim4 | (19814321..19816702 )                                                                                                                                                         | 100 | + | mRNA-like |
| gi 37550163 ref NT_022517.16 Hs3_22673 | Sim4 | (11018941..11020931 )                                                                                                                                                         | 100 | + | mRNA-like |
| gi 37550867 ref NT_005612.14 Hs3_5769  | Sim4 | (58869588..58871639 )                                                                                                                                                         | 100 | + | mRNA-like |

|                                        |      |                                                                                                                                                           |     |   |           |
|----------------------------------------|------|-----------------------------------------------------------------------------------------------------------------------------------------------------------|-----|---|-----------|
| gi 37550867 ref NT_005612.14 Hs3_5769  | Sim4 | (43225840..43227304,43229868..43231005)                                                                                                                   | 100 | + | mRNA-like |
| gi 37550867 ref NT_005612.14 Hs3_5769  | Sim4 | (85609035..85611123)                                                                                                                                      | 100 | - | mRNA-like |
| gi 37550163 ref NT_022517.16 Hs3_22673 | Sim4 | (35751196..35753643)                                                                                                                                      | 100 | + | mRNA-like |
| gi 37550867 ref NT_005612.14 Hs3_5769  | Sim4 | (21877532..21881250)                                                                                                                                      | 100 | + | mRNA-like |
| gi 37550867 ref NT_005612.14 Hs3_5769  | Sim4 | (85997812..86000907)                                                                                                                                      | 100 | + | mRNA-like |
| gi 37550163 ref NT_022517.16 Hs3_22673 | Sim4 | (58072181..58074895)                                                                                                                                      | 100 | + | mRNA-like |
| gi 37550867 ref NT_005612.14 Hs3_5769  | Sim4 | (90022383..90025567)                                                                                                                                      | 100 | + | mRNA-like |
| gi 37550265 ref NT_029928.11 Hs3_30183 | Sim4 | (41316..42277,42339..43582)                                                                                                                               | 100 | + | mRNA-like |
| gi 37550867 ref NT_005612.14 Hs3_5769  | Sim4 | (37248696..37250230)                                                                                                                                      | 100 | + | mRNA-like |
| gi 37550163 ref NT_022517.16 Hs3_22673 | Sim4 | (14020034..14022253)                                                                                                                                      | 100 | - | mRNA-like |
| gi 37550867 ref NT_005612.14 Hs3_5769  | Sim4 | (30996983..30997480,30998581..30999999)                                                                                                                   | 100 | - | mRNA-like |
| gi 37550867 ref NT_005612.14 Hs3_5769  | Sim4 | (75827071..75829288)                                                                                                                                      | 100 | - | mRNA-like |
| gi 37549731 ref NT_022459.13 Hs3_22615 | Sim4 | (9248291..9248484,9249924..9252146,9252257..9253255)                                                                                                      | 100 | + | mRNA-like |
| gi 37550867 ref NT_005612.14 Hs3_5769  | Sim4 | (36395081..36395279,36396746..36398956,36399064..36400059)                                                                                                | 100 | + | mRNA-like |
| gi 37550163 ref NT_022517.16 Hs3_22673 | Sim4 | (14180064..14181820,14182384..14182624)                                                                                                                   | 100 | + | mRNA-like |
| gi 37550867 ref NT_005612.14 Hs3_5769  | Sim4 | (45821679..45823995)                                                                                                                                      | 100 | + | mRNA-like |
| gi 37550867 ref NT_005612.14 Hs3_5769  | Sim4 | (92562480..92564841)                                                                                                                                      | 100 | - | mRNA-like |
| gi 37549731 ref NT_022459.13 Hs3_22615 | Sim4 | (9196262..9197714,9220158..9220692)                                                                                                                       | 100 | + | mRNA-like |
| gi 37550867 ref NT_005612.14 Hs3_5769  | Sim4 | (32076571..32077110,32099877..32101332)                                                                                                                   | 100 | - | mRNA-like |
| gi 37549731 ref NT_022459.13 Hs3_22615 | Sim4 | (9285067..9285547,9285580..9287120)                                                                                                                       | 100 | + | mRNA-like |
| gi 37550163 ref NT_022517.16 Hs3_22673 | Sim4 | (15122542..15124569)                                                                                                                                      | 100 | - | mRNA-like |
| gi 37550867 ref NT_005612.14 Hs3_5769  | Sim4 | (32008751..32010774)                                                                                                                                      | 100 | - | mRNA-like |
| gi 37550163 ref NT_022517.16 Hs3_22673 | Sim4 | (15112043..15112908,15113585..15113944,15113968..15115736)                                                                                                | 100 | - | mRNA-like |
| gi 37550867 ref NT_005612.14 Hs3_5769  | Sim4 | (32000580..32001446,32002118..32004250)                                                                                                                   | 100 | - | mRNA-like |
| gi 37550867 ref NT_005612.14 Hs3_5769  | Sim4 | (19216440..19218846)                                                                                                                                      | 100 | - | mRNA-like |
| gi 37550867 ref NT_005612.14 Hs3_5769  | Sim4 | (61872291..61874716)                                                                                                                                      | 100 | - | mRNA-like |
| gi 37550163 ref NT_022517.16 Hs3_22673 | Sim4 | (57046360..57048252)                                                                                                                                      | 100 | - | mRNA-like |
| gi 37550867 ref NT_005612.14 Hs3_5769  | Sim4 | (59597877..59598333,59598811..59600311)                                                                                                                   | 100 | - | mRNA-like |
| gi 37550867 ref NT_005612.14 Hs3_5769  | Sim4 | (22016393..22018094)                                                                                                                                      | 100 | - | mRNA-like |
| gi 37550163 ref NT_022517.16 Hs3_22673 | Sim4 | (5139000..5141287)                                                                                                                                        | 100 | + | mRNA-like |
| gi 37550867 ref NT_005612.14 Hs3_5769  | Sim4 | (36343285..36345411)                                                                                                                                      | 100 | + | mRNA-like |
| gi 37550867 ref NT_005612.14 Hs3_5769  | Sim4 | (77924138..77925883)                                                                                                                                      | 100 | - | mRNA-like |
| gi 37549731 ref NT_022459.13 Hs3_22615 | Sim4 | (15291713..15293337)                                                                                                                                      | 100 | + | mRNA-like |
| gi 37550867 ref NT_005612.14 Hs3_5769  | Sim4 | (13462934..13465446)                                                                                                                                      | 100 | + | mRNA-like |
| gi 37550163 ref NT_022517.16 Hs3_22673 | Sim4 | (3777444..3780132)                                                                                                                                        | 100 | - | mRNA-like |
| gi 37550867 ref NT_005612.14 Hs3_5769  | Sim4 | (74108902..74109030,74116252..74116396,74118809..74119001,74125732..74125850,74128007..74128149,74133511..74133737,74134890..74134982,74135335..74135919) | 100 | + | mRNA-like |
| gi 37550163 ref NT_022517.16 Hs3_22673 | Sim4 | (50631432..50632100,50632369..50633491)                                                                                                                   | 100 | + | mRNA-like |
| gi 37550163 ref NT_022517.16 Hs3_22673 | Sim4 | (42594008..42596094)                                                                                                                                      | 100 | + | mRNA-like |
| gi 37550163 ref NT_022517.16 Hs3_22673 | Sim4 | (32463814..32466626)                                                                                                                                      | 100 | + | mRNA-like |
| gi 37550163 ref NT_022517.16 Hs3_22673 | Sim4 | (29988694..29990176,29990263..29991450)                                                                                                                   | 100 | + | mRNA-like |
| gi 37550867 ref NT_005612.14 Hs3_5769  | Sim4 | (64948668..64950755)                                                                                                                                      | 100 | + | mRNA-like |
| gi 37550867 ref NT_005612.14 Hs3_5769  | Sim4 | (48150703..48152388,48157195..48157348)                                                                                                                   | 100 | - | mRNA-like |
| gi 37550265 ref NT_029928.11 Hs3_30183 | Sim4 | (257912..259869)                                                                                                                                          | 100 | + | mRNA-like |
| gi 37549731 ref NT_022459.13 Hs3_22615 | Sim4 | (9473801..9476435)                                                                                                                                        | 100 | - | mRNA-like |
| gi 37550163 ref NT_022517.16 Hs3_22673 | Sim4 | (14961450..14963113)                                                                                                                                      | 100 | + | mRNA-like |
| gi 37549731 ref NT_022459.13 Hs3_22615 | Sim4 | (9280733..9281206,9281230..9282495)                                                                                                                       | 100 | + | mRNA-like |
| gi 37550867 ref NT_005612.14 Hs3_5769  | Sim4 | (32013339..32014602,32014620..32015093)                                                                                                                   | 100 | - | mRNA-like |
| gi 37550163 ref NT_022517.16 Hs3_22673 | Sim4 | (11553717..11554768,11554830..11555592,11564130..11565091)                                                                                                | 100 | + | mRNA-like |
| gi 37550163 ref NT_022517.16 Hs3_22673 | Sim4 | (53243736..53244026,53244431..53245322,53245921..53246970)                                                                                                | 100 | - | mRNA-like |
| gi 37550867 ref NT_005612.14 Hs3_5769  | Sim4 | (22021392..22022082,22022166..22023605)                                                                                                                   | 100 | - | mRNA-like |
| gi 37550163 ref NT_022517.16 Hs3_22673 | Sim4 | (51909910..51911964)                                                                                                                                      | 100 | - | mRNA-like |
| gi 37550163 ref NT_022517.16 Hs3_22673 | Sim4 | (39480931..39483084)                                                                                                                                      | 100 | + | mRNA-like |
| gi 37549731 ref NT_022459.13 Hs3_22615 | Sim4 | (19812874..19815967)                                                                                                                                      | 100 | + | mRNA-like |
| gi 37550163 ref NT_022517.16 Hs3_22673 | Sim4 | (53815368..53817951)                                                                                                                                      | 100 | - | mRNA-like |
| gi 37550265 ref NT_029928.11 Hs3_30183 | Sim4 | (2303345..2306423,2306549..2306688)                                                                                                                       | 100 | - | mRNA-like |
| gi 37550867 ref NT_005612.14 Hs3_5769  | Sim4 | (32665122..32666903)                                                                                                                                      | 100 | - | mRNA-like |
| gi 37550867 ref NT_005612.14 Hs3_5769  | Sim4 | (52717511..52719501)                                                                                                                                      | 100 | - | mRNA-like |
| gi 37550163 ref NT_022517.16 Hs3_22673 | Sim4 | (39489353..39491409,39491527..39492157)                                                                                                                   | 100 | + | mRNA-like |
| gi 37550163 ref NT_022517.16 Hs3_22673 | Sim4 | (3682498..3684145,3759409..3759487,3760925..3761006,3764187..3764385,3770598..3770758,3782385..3782559)                                                   | 100 | - | mRNA-like |

|                                       |      |                                                                                                                                                                                        |  |     |   |           |
|---------------------------------------|------|----------------------------------------------------------------------------------------------------------------------------------------------------------------------------------------|--|-----|---|-----------|
| gj37550867 ref NT 005612.14 Hs3 5769  | Sim4 | ( 76300756..76302536 )                                                                                                                                                                 |  | 100 | + | mRNA-like |
| gj37550867 ref NT 005612.14 Hs3 5769  | Sim4 | ( 25883527..25885838, 25885932..25886331 )                                                                                                                                             |  | 100 | - | mRNA-like |
| gj37549731 ref NT 022459.13 Hs3 22615 | Sim4 | ( 2163979..2166712 )                                                                                                                                                                   |  | 100 | + | mRNA-like |
| gj37550867 ref NT 005612.14 Hs3 5769  | Sim4 | ( 18739541..18742135 )                                                                                                                                                                 |  | 100 | - | mRNA-like |
| gj37550163 ref NT 022517.16 Hs3 22673 | Sim4 | ( 24100436..24103439 )                                                                                                                                                                 |  | 100 | - | mRNA-like |
| gj37549731 ref NT 022459.13 Hs3 22615 | Sim4 | ( 20681813..20684606 )                                                                                                                                                                 |  | 100 | - | mRNA-like |
| gj37550163 ref NT 022517.16 Hs3 22673 | Sim4 | ( 40279189..40280709 )                                                                                                                                                                 |  | 100 | - | mRNA-like |
| gj37550867 ref NT 005612.14 Hs3 5769  | Sim4 | ( 49140670..49140892, 49147201..49147264, 49150419..49150642, 49152471..49152649, 49155395..49156530 )                                                                                 |  | 100 | + | mRNA-like |
| gj37550163 ref NT 022517.16 Hs3 22673 | Sim4 | ( 15629071..15631948 )                                                                                                                                                                 |  | 100 | + | mRNA-like |
| gj37549731 ref NT 022459.13 Hs3 22615 | Sim4 | ( 2775837..2777997 )                                                                                                                                                                   |  | 100 | - | mRNA-like |
| gj37550867 ref NT 005612.14 Hs3 5769  | Sim4 | ( 48159142..48161387 )                                                                                                                                                                 |  | 100 | - | mRNA-like |
| gj37550163 ref NT 022517.16 Hs3 22673 | Sim4 | ( 44458856..44461822 )                                                                                                                                                                 |  | 100 | - | mRNA-like |
| gj37549731 ref NT 022459.13 Hs3 22615 | Sim4 | ( 9266896..9269273, 9269304..9269707 )                                                                                                                                                 |  | 100 | + | mRNA-like |
| gj37550867 ref NT 005612.14 Hs3 5769  | Sim4 | ( 32026204..32026600, 32026624..32029019 )                                                                                                                                             |  | 100 | - | mRNA-like |
| gj37550867 ref NT 005612.14 Hs3 5769  | Sim4 | ( 14257293..14258405, 14258420..14259843 )                                                                                                                                             |  | 100 | - | mRNA-like |
| gj37550163 ref NT 022517.16 Hs3 22673 | Sim4 | ( 49958552..49961214 )                                                                                                                                                                 |  | 100 | + | mRNA-like |
| gj37550163 ref NT 022517.16 Hs3 22673 | Sim4 | ( 24099916..24101234 )                                                                                                                                                                 |  | 100 | - | mRNA-like |
| gj37550163 ref NT 022517.16 Hs3 22673 | Sim4 | ( 33579237..33580696 )                                                                                                                                                                 |  | 100 | - | mRNA-like |
| gj37549731 ref NT 022459.13 Hs3 22615 | Sim4 | ( 2863503..2864840 )                                                                                                                                                                   |  | 100 | - | mRNA-like |
| gj37549731 ref NT 022459.13 Hs3 22615 | Sim4 | ( 2813952..2817046 )                                                                                                                                                                   |  | 100 | - | mRNA-like |
| gj37549731 ref NT 022459.13 Hs3 22615 | Sim4 | ( 5778833..5779834, 5799879..5799980, 5803705..5804127, 5804528..5804629, 5804821..5805112, 5843922..5844028, 5844187..5844445 )                                                       |  | 100 | - | mRNA-like |
| gj37550867 ref NT 005612.14 Hs3 5769  | Sim4 | ( 49344682..49346440 )                                                                                                                                                                 |  | 100 | + | mRNA-like |
| gj37550163 ref NT 022517.16 Hs3 22673 | Sim4 | ( 49510992..49512887, 49514993..49515132, 49515538..49515618, 49515697..49515783 )                                                                                                     |  | 100 | - | mRNA-like |
| gj37550867 ref NT 005612.14 Hs3 5769  | Sim4 | ( 64758167..64758524, 64766809..64766988, 64774344..64774452, 64780907..64781003, 64783118..64784013 )                                                                                 |  | 100 | - | mRNA-like |
| gj37550867 ref NT 005612.14 Hs3 5769  | Sim4 | ( 60486033..60487795 )                                                                                                                                                                 |  | 100 | - | mRNA-like |
| gj37549731 ref NT 022459.13 Hs3 22615 | Sim4 | ( 9382290..9384303 )                                                                                                                                                                   |  | 100 | - | mRNA-like |
| gj37549731 ref NT 022459.13 Hs3 22615 | Sim4 | ( 3024954..3026967 )                                                                                                                                                                   |  | 100 | - | mRNA-like |
| gj37550867 ref NT 005612.14 Hs3 5769  | Sim4 | ( 42907748..42909734 )                                                                                                                                                                 |  | 100 | - | mRNA-like |
| gj37550163 ref NT 022517.16 Hs3 22673 | Sim4 | ( 24099671..24102310 )                                                                                                                                                                 |  | 100 | - | mRNA-like |
| gj37550163 ref NT 022517.16 Hs3 22673 | Sim4 | ( 57925005..57927037 )                                                                                                                                                                 |  | 100 | + | mRNA-like |
| gj37549731 ref NT 022459.13 Hs3 22615 | Sim4 | ( 9418251..9419719, 9419807..9420464 )                                                                                                                                                 |  | 100 | + | mRNA-like |
| gj37549731 ref NT 022459.13 Hs3 22615 | Sim4 | ( 14994332..14996086 )                                                                                                                                                                 |  | 100 | + | mRNA-like |
| gj37550163 ref NT 022517.16 Hs3 22673 | Sim4 | ( 43307558..43309217 )                                                                                                                                                                 |  | 100 | + | mRNA-like |
| gj37550163 ref NT 022517.16 Hs3 22673 | Sim4 | ( 48897039..48898190, 48898485..48899102 )                                                                                                                                             |  | 100 | + | mRNA-like |
| gj37550163 ref NT 022517.16 Hs3 22673 | Sim4 | ( 14590816..14590907, 15294695..15297522 )                                                                                                                                             |  | 100 | - | mRNA-like |
| gj37550867 ref NT 005612.14 Hs3 5769  | Sim4 | ( 20565828..20565949, 20570046..20570174, 20571161..20571220, 20573342..20573501, 20580689..20580874, 20580960..20581214, 20589787..20589829, 20601416..20601572, 20602389..20602963 ) |  | 100 | + | mRNA-like |
| gj37550867 ref NT 005612.14 Hs3 5769  | Sim4 | ( 76663888..76665585 )                                                                                                                                                                 |  | 100 | + | mRNA-like |
| gj37550867 ref NT 005612.14 Hs3 5769  | Sim4 | ( 54152946..54153057, 54153500..54155955 )                                                                                                                                             |  | 100 | + | mRNA-like |
| gj37550867 ref NT 005612.14 Hs3 5769  | Sim4 | ( 61841495..61842806 )                                                                                                                                                                 |  | 100 | - | mRNA-like |
| gj37550163 ref NT 022517.16 Hs3 22673 | Sim4 | ( 35356951..35359322 )                                                                                                                                                                 |  | 100 | - | mRNA-like |
| gj37550163 ref NT 022517.16 Hs3 22673 | Sim4 | ( 29628039..29628885 )                                                                                                                                                                 |  | 100 | + | mRNA-like |
| gj37550163 ref NT 022517.16 Hs3 22673 | Sim4 | ( 14418044..14418112, 14419508..14419526, 48627070..48628590 )                                                                                                                         |  | 100 | - | mRNA-like |
| gj37549731 ref NT 022459.13 Hs3 22615 | Sim4 | ( 6052147..6052165, 6118747..6122302 )                                                                                                                                                 |  | 100 | - | mRNA-like |
| gj37549731 ref NT 022459.13 Hs3 22615 | Sim4 | ( 7102441..7102460, 7126268..7127298 )                                                                                                                                                 |  | 100 | - | mRNA-like |
| gj37550867 ref NT 005612.14 Hs3 5769  | Sim4 | ( 81081042..81082969 )                                                                                                                                                                 |  | 100 | + | mRNA-like |
| gj37550265 ref NT 029928.11 Hs3 30183 | Sim4 | ( 1478179..1479545 )                                                                                                                                                                   |  | 100 | - | mRNA-like |
| gj37550163 ref NT 022517.16 Hs3 22673 | Sim4 | ( 57958095..57958113, 65618278..65621085 )                                                                                                                                             |  | 100 | - | mRNA-like |
| gj37550163 ref NT 022517.16 Hs3 22673 | Sim4 | ( 3745646..3752056 )                                                                                                                                                                   |  | 100 | - | mRNA-like |
| gj37550163 ref NT 022517.16 Hs3 22673 | Sim4 | ( 3745646..3752056 )                                                                                                                                                                   |  | 100 | - | mRNA-like |
| gj37550163 ref NT 022517.16 Hs3 22673 | Sim4 | ( 7221812..7221832, 9370532..9372181, 9373363..9373510, 9379108..9379174 )                                                                                                             |  | 100 | - | mRNA-like |
| gj37550163 ref NT 022517.16 Hs3 22673 | Sim4 | ( 40429459..40429569, 40433580..40434239, 48180482..48180497, 48180589..48180607 )                                                                                                     |  | 100 | + | mRNA-like |
| gj37550265 ref NT 029928.11 Hs3 30183 | Sim4 | ( 272834..272851, 1279331..1279361, 1282010..1283052 )                                                                                                                                 |  | 100 | - | mRNA-like |
| gj37550867 ref NT 005612.14 Hs3 5769  | Sim4 | ( 35601958..35603726 )                                                                                                                                                                 |  | 100 | - | mRNA-like |
| gj37550867 ref NT 005612.14 Hs3 5769  | Sim4 | ( 27526361..27526374, 27526438..27526467, 46719615..46720161, 46720648..46722785 )                                                                                                     |  | 100 | - | mRNA-like |
| gj37550867 ref NT 005612.14 Hs3 5769  | Sim4 | ( 56747497..56747521, 56755453..56757439, 56758644..56758719, 56758993..56759391 )                                                                                                     |  | 100 | - | mRNA-like |
| gj37550265 ref NT 029928.11 Hs3 30183 | Sim4 | ( 811043..811565 )                                                                                                                                                                     |  | 100 | + | mRNA-like |

|                                        |      |                                                                                                                                                                                                                                                                                                    |     |   |           |
|----------------------------------------|------|----------------------------------------------------------------------------------------------------------------------------------------------------------------------------------------------------------------------------------------------------------------------------------------------------|-----|---|-----------|
| gi 37550867 ref NT_005612.14 Hs3_5769  | Sim4 | (30900796..30900827,31460267..31465278)                                                                                                                                                                                                                                                            | 100 | - | mRNA-like |
| gi 37550163 ref NT_022517.16 Hs3_22673 | Sim4 | (61785920..61788658,61802316..61802339)                                                                                                                                                                                                                                                            | 100 | + | mRNA-like |
| gi 37550265 ref NT_029928.11 Hs3_30183 | Sim4 | (2514443..2514575,2527459..2527568,2528631..2528762,2532053..2532268,2533153..2533218,2535376..2535434,2536541..2537070,2545650..2545714,2554968..2555091,2556949..2557072,2557409..2557605,2558450..2558514,2560701..2561386,2561614..2561671,2561765..2561997,2562776..2562970,2574898..2575525) | 100 | + | mRNA-like |
| gi 37549731 ref NT_022459.13 Hs3_22615 | Sim4 | (5322941..5322962,5422604..5427123)                                                                                                                                                                                                                                                                | 100 | - | mRNA-like |
| gi 37550867 ref NT_005612.14 Hs3_5769  | Sim4 | (38172607..38172629,38172964..38173010,90196699..90198388)                                                                                                                                                                                                                                         | 100 | - | mRNA-like |
| gi 37550163 ref NT_022517.16 Hs3_22673 | Sim4 | (9217186..9220753)                                                                                                                                                                                                                                                                                 | 100 | - | mRNA-like |
| gi 37549731 ref NT_022459.13 Hs3_22615 | Sim4 | (2862869..2862911,2863456..2863493,2865529..2865551,8006404..8008340,8010320..8010358)                                                                                                                                                                                                             | 100 | - | mRNA-like |
| gi 37550867 ref NT_005612.14 Hs3_5769  | Sim4 | (38172608..38172629,38172964..38173010,40038233..40039751)                                                                                                                                                                                                                                         | 100 | - | mRNA-like |
| gi 37549731 ref NT_022459.13 Hs3_22615 | Sim4 | (18750181..18752484)                                                                                                                                                                                                                                                                               | 100 | + | mRNA-like |
| gi 37550867 ref NT_005612.14 Hs3_5769  | Sim4 | (55110923..55112505,55112526..55113289,55120496..55120751,55292310..55292344)                                                                                                                                                                                                                      | 100 | + | mRNA-like |
| gi 37550867 ref NT_005612.14 Hs3_5769  | Sim4 | (25636768..25641838,25641852..25643650)                                                                                                                                                                                                                                                            | 100 | + | mRNA-like |
| gi 37550867 ref NT_005612.14 Hs3_5769  | Sim4 | (65506302..65508216)                                                                                                                                                                                                                                                                               | 100 | + | mRNA-like |
| gi 37550163 ref NT_022517.16 Hs3_22673 | Sim4 | (4825808..4828807)                                                                                                                                                                                                                                                                                 | 100 | - | mRNA-like |
| gi 37550867 ref NT_005612.14 Hs3_5769  | Sim4 | (28162414..28162452,29640304..29643422)                                                                                                                                                                                                                                                            | 100 | - | mRNA-like |
| gi 37550163 ref NT_022517.16 Hs3_22673 | Sim4 | (4825808..4828805)                                                                                                                                                                                                                                                                                 | 100 | - | mRNA-like |
| gi 37550163 ref NT_022517.16 Hs3_22673 | Sim4 | (64592923..64593352,64707479..64709097,64709112..64710739)                                                                                                                                                                                                                                         | 100 | + | mRNA-like |
| gi 37550163 ref NT_022517.16 Hs3_22673 | Sim4 | (59693374..59696803)                                                                                                                                                                                                                                                                               | 100 | - | mRNA-like |
| gi 37550867 ref NT_005612.14 Hs3_5769  | Sim4 | (55464534..55464555,55531908..55534433,55535197..55535377,55537821..55537963,55543271..55543360,55546147..55546340,55546454..55546625)                                                                                                                                                             | 100 | - | mRNA-like |
| gi 37550163 ref NT_022517.16 Hs3_22673 | Sim4 | (56735853..56739637)                                                                                                                                                                                                                                                                               | 100 | - | mRNA-like |
| gi 37550867 ref NT_005612.14 Hs3_5769  | Sim4 | (69966933..69970105)                                                                                                                                                                                                                                                                               | 100 | + | mRNA-like |
| gi 37550867 ref NT_005612.14 Hs3_5769  | Sim4 | (11592446..11594045,11601383..11602215)                                                                                                                                                                                                                                                            | 100 | + | mRNA-like |
| gi 37550163 ref NT_022517.16 Hs3_22673 | Sim4 | (27117560..27117589,27354179..27356203)                                                                                                                                                                                                                                                            | 100 | - | mRNA-like |
| gi 37549731 ref NT_022459.13 Hs3_22615 | Sim4 | (6805920..6807157)                                                                                                                                                                                                                                                                                 | 100 | + | mRNA-like |
| gi 37550867 ref NT_005612.14 Hs3_5769  | Sim4 | (4752899..4752909,4753069..4753087,71986025..71986452,71999091..71999257,72050260..72050366)                                                                                                                                                                                                       | 100 | - | mRNA-like |
| gi 37549731 ref NT_022459.13 Hs3_22615 | Sim4 | (3723349..3724344,24002024..24002053,24002260..24002285)                                                                                                                                                                                                                                           | 100 | + | mRNA-like |
| gi 37550867 ref NT_005612.14 Hs3_5769  | Sim4 | (93050171..93050196,93333893..93334274,93340945..93341008,93352159..93352421)                                                                                                                                                                                                                      | 100 | - | mRNA-like |
| gi 37550867 ref NT_005612.14 Hs3_5769  | Sim4 | (55396970..55396997,55534009..55534433,55535197..55535377,55537821..55537963,55543271..55543360,55546147..55546340,55546454..55546578)                                                                                                                                                             | 100 | - | mRNA-like |
| gi 37550163 ref NT_022517.16 Hs3_22673 | Sim4 | (1894423..1894434,1894621..1894643,6754602..6755047)                                                                                                                                                                                                                                               | 100 | - | mRNA-like |
| gi 37550265 ref NT_029928.11 Hs3_30183 | Sim4 | (883132..883417)                                                                                                                                                                                                                                                                                   | 100 | + | mRNA-like |
| gi 37549731 ref NT_022459.13 Hs3_22615 | Sim4 | (18455029..18455396,21662222..21662412,21662451..21663737)                                                                                                                                                                                                                                         | 100 | + | mRNA-like |
| gi 37550163 ref NT_022517.16 Hs3_22673 | Sim4 | (7048493..7048522,43350674..43351228,43351273..43352462,57393225..57393285)                                                                                                                                                                                                                        | 100 | + | mRNA-like |
| gi 37550867 ref NT_005612.14 Hs3_5769  | Sim4 | (56239647..56240210,56240244..56241509,93708498..93708514)                                                                                                                                                                                                                                         | 100 | + | mRNA-like |
| gi 37550163 ref NT_022517.16 Hs3_22673 | Sim4 | (42827010..42828642)                                                                                                                                                                                                                                                                               | 100 | + | mRNA-like |
| gi 37550867 ref NT_005612.14 Hs3_5769  | Sim4 | (20748070..20749678)                                                                                                                                                                                                                                                                               | 100 | + | mRNA-like |
| gi 37550893 ref NT_079507.1 Hs3_79572  | Sim4 | (132019..133626)                                                                                                                                                                                                                                                                                   | 100 | - | mRNA-like |
| gi 37549731 ref NT_022459.13 Hs3_22615 | Sim4 | (1716706..1717953,2542235..2542277)                                                                                                                                                                                                                                                                | 100 | + | mRNA-like |
| gi 37550163 ref NT_022517.16 Hs3_22673 | Sim4 | (12058816..12060102)                                                                                                                                                                                                                                                                               | 100 | - | mRNA-like |
| gi 37549731 ref NT_022459.13 Hs3_22615 | Sim4 | (12233660..12235516,13527878..13527967)                                                                                                                                                                                                                                                            | 100 | + | mRNA-like |
| gi 37550893 ref NT_079507.1 Hs3_79572  | Sim4 | (130947..132894)                                                                                                                                                                                                                                                                                   | 100 | - | mRNA-like |
| gi 37550867 ref NT_005612.14 Hs3_5769  | Sim4 | (98754992..98757278)                                                                                                                                                                                                                                                                               | 100 | - | mRNA-like |
| gi 37550867 ref NT_005612.14 Hs3_5769  | Sim4 | (70844606..70846685)                                                                                                                                                                                                                                                                               | 100 | + | mRNA-like |
| gi 37550867 ref NT_005612.14 Hs3_5769  | Sim4 | (1188966..1189021,7700495..7701015,7702551..7702600,7705855..7706084,11619274..11620732)                                                                                                                                                                                                           | 100 | + | mRNA-like |
| gi 37550265 ref NT_029928.11 Hs3_30183 | Sim4 | (1327485..1328619)                                                                                                                                                                                                                                                                                 | 100 | + | mRNA-like |
| gi 37549731 ref NT_022459.13 Hs3_22615 | Sim4 | (5770265..5771859,12067540..12067901)                                                                                                                                                                                                                                                              | 100 | + | mRNA-like |

|                                       |      |                                                                                                                                                                    |     |   |           |
|---------------------------------------|------|--------------------------------------------------------------------------------------------------------------------------------------------------------------------|-----|---|-----------|
| gj37550163 ref NT 022517.16 Hs3 22673 | Sim4 | ( 16729577..16731534 )                                                                                                                                             | 100 | + | mRNA-like |
| gj37550867 ref NT 005612.14 Hs3 5769  | Sim4 | ( 5122560..5124888 )                                                                                                                                               | 100 | + | mRNA-like |
| gj37549731 ref NT 022459.13 Hs3 22615 | Sim4 | ( 11107089..11108989 )                                                                                                                                             | 100 | + | mRNA-like |
| gj37550867 ref NT 005612.14 Hs3 5769  | Sim4 | ( 27356675..27358132 )                                                                                                                                             | 100 | + | mRNA-like |
| gj37550867 ref NT 005612.14 Hs3 5769  | Sim4 | ( 1868413..1869837, 1877234..1877330, 1882400..1882755, 1894992..1895115, 1896591..1897183 )                                                                       | 100 | - | mRNA-like |
| gj37550867 ref NT 005612.14 Hs3 5769  | Sim4 | ( 79297924..79298926, 79298947..79300747 )                                                                                                                         | 100 | - | mRNA-like |
| gj37550893 ref NT 079507.1 Hs3 79572  | Sim4 | ( 131009..133828 )                                                                                                                                                 | 100 | - | mRNA-like |
| gj37549731 ref NT 022459.13 Hs3 22615 | Sim4 | ( 674399..675811, 675853..676554, 678542..678820 )                                                                                                                 | 100 | + | mRNA-like |
| gj37550163 ref NT 022517.16 Hs3 22673 | Sim4 | ( 60930224..60931479, 60955615..60955751, 60955772..60956485, 60991317..60991597 )                                                                                 | 100 | + | mRNA-like |
| gj37550265 ref NT 029928.11 Hs3 30183 | Sim4 | ( 730775..731596, 733012..733604, 733701..734403, 737066..737212, 738980..739061, 739360..739406 )                                                                 | 100 | + | mRNA-like |
| gj37550867 ref NT 005612.14 Hs3 5769  | Sim4 | ( 5806223..5806317, 7953124..7953613, 7953915..7954578, 7954887..7955048, 7960322..7961025, 7987684..7987960 )                                                     | 100 | + | mRNA-like |
| gj37550893 ref NT 079507.1 Hs3 79572  | Sim4 | ( 75044..75198, 77372..77448, 93407..93445, 101882..102138, 130459..130911, 130926..132342 )                                                                       | 100 | - | mRNA-like |
| gj37550163 ref NT 022517.16 Hs3 22673 | Sim4 | ( 32052043..32054191, 37172373..37172425, 37172460..37172519, 37172843..37172916 )                                                                                 | 100 | + | mRNA-like |
| gj37550163 ref NT 022517.16 Hs3 22673 | Sim4 | ( 15952931..15954285 )                                                                                                                                             | 100 | + | mRNA-like |
| gj37550163 ref NT 022517.16 Hs3 22673 | Sim4 | ( 49194447..49195521, 60895592..60895639 )                                                                                                                         | 100 | + | mRNA-like |
| gj37550867 ref NT 005612.14 Hs3 5769  | Sim4 | ( 91322791..91323918 )                                                                                                                                             | 100 | + | mRNA-like |
| gj37550163 ref NT 022517.16 Hs3 22673 | Sim4 | ( 52369747..52371751 )                                                                                                                                             | 100 | + | mRNA-like |
| gj37550867 ref NT 005612.14 Hs3 5769  | Sim4 | ( 20834303..20836863 )                                                                                                                                             | 100 | - | mRNA-like |
| gj37550867 ref NT 005612.14 Hs3 5769  | Sim4 | ( 91699985..91702039 )                                                                                                                                             | 100 | + | mRNA-like |
| gj37550163 ref NT 022517.16 Hs3 22673 | Sim4 | ( 12388346..12390917 )                                                                                                                                             | 100 | + | mRNA-like |
| gj37550163 ref NT 022517.16 Hs3 22673 | Sim4 | ( 20347425..20349994 )                                                                                                                                             | 100 | - | mRNA-like |
| gj37550867 ref NT 005612.14 Hs3 5769  | Sim4 | ( 95097604..95099577 )                                                                                                                                             | 100 | + | mRNA-like |
| gj37550163 ref NT 022517.16 Hs3 22673 | Sim4 | ( 44368345..44368418, 44374526..44376531 )                                                                                                                         | 100 | + | mRNA-like |
| gj37550163 ref NT 022517.16 Hs3 22673 | Sim4 | ( 58633622..58636199, 58637955..58638079 )                                                                                                                         | 100 | - | mRNA-like |
| gj37550867 ref NT 005612.14 Hs3 5769  | Sim4 | ( 56676399..56679359 )                                                                                                                                             | 100 | + | mRNA-like |
| gj37550163 ref NT 022517.16 Hs3 22673 | Sim4 | ( 40463043..40466333 )                                                                                                                                             | 100 | + | mRNA-like |
| gj37550163 ref NT 022517.16 Hs3 22673 | Sim4 | ( 8858877..8861296, 8861351..8861466 )                                                                                                                             | 100 | - | mRNA-like |
| gj37550867 ref NT 005612.14 Hs3 5769  | Sim4 | ( 42355546..42358656 )                                                                                                                                             | 100 | + | mRNA-like |
| gj37550163 ref NT 022517.16 Hs3 22673 | Sim4 | ( 50029134..50031802 )                                                                                                                                             | 100 | + | mRNA-like |
| gj37550163 ref NT 022517.16 Hs3 22673 | Sim4 | ( 24097376..24099100 )                                                                                                                                             | 100 | - | mRNA-like |
| gj37550867 ref NT 005612.14 Hs3 5769  | Sim4 | ( 14261073..14261285, 14265932..14267930 )                                                                                                                         | 100 | - | mRNA-like |
| gj37550867 ref NT 005612.14 Hs3 5769  | Sim4 | ( 42551398..42553312 )                                                                                                                                             | 100 | - | mRNA-like |
| gj37550163 ref NT 022517.16 Hs3 22673 | Sim4 | ( 18326884..18329020 )                                                                                                                                             | 100 | - | mRNA-like |
| gj37550867 ref NT 005612.14 Hs3 5769  | Sim4 | ( 19421388..19423456 )                                                                                                                                             | 100 | - | mRNA-like |
| gj37550163 ref NT 022517.16 Hs3 22673 | Sim4 | ( 9941508..9944223 )                                                                                                                                               | 100 | + | mRNA-like |
| gj37550867 ref NT 005612.14 Hs3 5769  | Sim4 | ( 36411061..36414485 )                                                                                                                                             | 100 | + | mRNA-like |
| gj37550867 ref NT 005612.14 Hs3 5769  | Sim4 | ( 57647691..57649619 )                                                                                                                                             | 100 | + | mRNA-like |
| gj37550867 ref NT 005612.14 Hs3 5769  | Sim4 | ( 35195052..35198293 )                                                                                                                                             | 100 | - | mRNA-like |
| gj37550163 ref NT 022517.16 Hs3 22673 | Sim4 | ( 50221841..50224942 )                                                                                                                                             | 100 | + | mRNA-like |
| gj37550163 ref NT 022517.16 Hs3 22673 | Sim4 | ( 17177267..17181156 )                                                                                                                                             | 100 | - | mRNA-like |
| gj37550867 ref NT 005612.14 Hs3 5769  | Sim4 | ( 33925743..33928890 )                                                                                                                                             | 100 | - | mRNA-like |
| gj37550265 ref NT 029928.11 Hs3 30183 | Sim4 | ( 35298..38426 )                                                                                                                                                   | 100 | + | mRNA-like |
| gj37549731 ref NT 022459.13 Hs3 22615 | Sim4 | ( 9338615..9341417 )                                                                                                                                               | 100 | + | mRNA-like |
| gj37550867 ref NT 005612.14 Hs3 5769  | Sim4 | ( 31940583..31943377 )                                                                                                                                             | 100 | - | mRNA-like |
| gj37550265 ref NT 029928.11 Hs3 30183 | Sim4 | ( 306362..308004, 308058..308095, 308404..308515, 308549..308739, 308860..308917, 308954..309280 )                                                                 | 100 | - | mRNA-like |
| gj37549731 ref NT 022459.13 Hs3 22615 | Sim4 | ( 9506303..9508653 )                                                                                                                                               | 100 | + | mRNA-like |
| gj37550163 ref NT 022517.16 Hs3 22673 | Sim4 | ( 56513586..56513629, 56515222..56515286, 56515945..56515970, 56517238..56517388, 56520060..56520501, 56522970..56523116, 56523326..56523429, 56525689..56527122 ) | 100 | + | mRNA-like |
| gj37550867 ref NT 005612.14 Hs3 5769  | Sim4 | ( 28776357..28778235 )                                                                                                                                             | 100 | - | mRNA-like |
| gj37550163 ref NT 022517.16 Hs3 22673 | Sim4 | ( 57046360..57049170 )                                                                                                                                             | 100 | - | mRNA-like |
| gj37550163 ref NT 022517.16 Hs3 22673 | Sim4 | ( 989819..989950, 991052..994618 )                                                                                                                                 | 100 | + | mRNA-like |
| gj37550163 ref NT 022517.16 Hs3 22673 | Sim4 | ( 45648277..45653422 )                                                                                                                                             | 100 | + | mRNA-like |
| gj37550265 ref NT 029928.11 Hs3 30183 | Sim4 | ( 295794..299300 )                                                                                                                                                 | 100 | - | mRNA-like |
| gj37549731 ref NT 022459.13 Hs3 22615 | Sim4 | ( 8564228..8564273, 12510253..12512164, 12512797..12512960 )                                                                                                       | 100 | - | mRNA-like |
| gj37550867 ref NT 005612.14 Hs3 5769  | Sim4 | ( 17855593..17857728 )                                                                                                                                             | 100 | + | mRNA-like |
| gj37550867 ref NT 005612.14 Hs3 5769  | Sim4 | ( 26047871..26049473 )                                                                                                                                             | 100 | - | mRNA-like |
| gj37550867 ref NT 005612.14 Hs3 5769  | Sim4 | ( 95026152..95028481 )                                                                                                                                             | 100 | + | mRNA-like |
| gj37550867 ref NT 005612.14 Hs3 5769  | Sim4 | ( 58479192..58481300 )                                                                                                                                             | 100 | - | mRNA-like |

|                                        |       |                                                                                                      |          |       |   |           |
|----------------------------------------|-------|------------------------------------------------------------------------------------------------------|----------|-------|---|-----------|
| gi 37550867 ref NT_005612.14 Hs3_5769  | Sim4  | (57065425..57065547, 57275867..57275944, 57277954..57278017, 57279251..57279370, 57291830..57293667) |          | 100   | + | mRNA-like |
| gi 37549731 ref NT_022459.13 Hs3_22615 | Sim4  | (9301368..9303694)                                                                                   |          | 100   | + | mRNA-like |
| gi 37550867 ref NT_005612.14 Hs3_5769  | Sim4  | (34967434..34969280)                                                                                 |          | 100   | + | mRNA-like |
| gi 37550867 ref NT_005612.14 Hs3_5769  | Sim4  | (77578147..77581971)                                                                                 |          | 100   | - | mRNA-like |
| gi 37550163 ref NT_022517.16 Hs3_22673 | Sim4  | (43038271..43042166)                                                                                 |          | 100   | + | mRNA-like |
| gi 37550867 ref NT_005612.14 Hs3_5769  | Sim4  | (41037920..41040073)                                                                                 |          | 100   | + | mRNA-like |
| gi 37550163 ref NT_022517.16 Hs3_22673 | Sim4  | (48809402..48809853, 48810432..48813426)                                                             |          | 100   | + | mRNA-like |
| gi 37550163 ref NT_022517.16 Hs3_22673 | Sim4  | (5162937..5167037)                                                                                   |          | 100   | + | mRNA-like |
| gi 37550867 ref NT_005612.14 Hs3_5769  | Sim4  | (44506702..44510507)                                                                                 |          | 100   | + | mRNA-like |
| gi 37550163 ref NT_022517.16 Hs3_22673 | Sim4  | (41178598..41181477)                                                                                 |          | 100   | + | mRNA-like |
| gi 37550867 ref NT_005612.14 Hs3_5769  | Sim4  | (48205091..48207016)                                                                                 |          | 100   | - | mRNA-like |
| gi 37550867 ref NT_005612.14 Hs3_5769  | Sim4  | (78803661..78806662, 78807409..78807531)                                                             |          | 100   | - | mRNA-like |
| gi 37550163 ref NT_022517.16 Hs3_22673 | Sim4  | (37173735..37176935)                                                                                 |          | 100   | + | mRNA-like |
| gi 37550867 ref NT_005612.14 Hs3_5769  | Sim4  | (40873799..40876279)                                                                                 |          | 100   | + | mRNA-like |
| gi 37550867 ref NT_005612.14 Hs3_5769  | Sim4  | (26506532..26510587)                                                                                 |          | 100   | + | mRNA-like |
| gi 37550163 ref NT_022517.16 Hs3_22673 | Sim4  | (9375634..9378572)                                                                                   |          | 100   | - | mRNA-like |
| gi 37550867 ref NT_005612.14 Hs3_5769  | Sim4  | (94942351..94945662)                                                                                 |          | 100   | + | mRNA-like |
| gi 37549731 ref NT_022459.13 Hs3_22615 | Sim4  | (5328258..5330724)                                                                                   |          | 100   | + | mRNA-like |
| gi 37550163 ref NT_022517.16 Hs3_22673 | Sim4  | (9940401..9944195)                                                                                   |          | 100   | + | mRNA-like |
| gi 37550867 ref NT_005612.14 Hs3_5769  | Sim4  | (22380798..22380839, 44976192..44979978)                                                             |          | 100   | - | mRNA-like |
| gi 37550867 ref NT_005612.14 Hs3_5769  | Sim4  | (36061047..36061954)                                                                                 |          | 100   | - | mRNA-like |
| gi 37549731 ref NT_022459.13 Hs3_22615 | Sim4  | (7288411..7290194)                                                                                   |          | 100   | - | mRNA-like |
| gi 37549731 ref NT_022459.13 Hs3_22615 | Sim4  | (7897873..7897906, 7977912..7979232)                                                                 |          | 100   | - | mRNA-like |
| gi 37550163 ref NT_022517.16 Hs3_22673 | Sim4  | (35158813..35160164, 50798134..50798157)                                                             |          | 100   | - | mRNA-like |
| gi 37549731 ref NT_022459.13 Hs3_22615 | Sim4  | (4537171..4537967)                                                                                   |          | 100   | - | mRNA-like |
| gi 37550163 ref NT_022517.16 Hs3_22673 | Sim4  | (28164511..28164567, 46240416..46241150)                                                             |          | 100   | + | mRNA-like |
| gi 37550867 ref NT_005612.14 Hs3_5769  | Sim4  | (33728911..33729707)                                                                                 |          | 100   | + | mRNA-like |
| gi 37550894 ref NT_079508.1 Hs3_79573  | Sim4  | (61320..62120)                                                                                       |          | 100   | - | mRNA-like |
| gi 37550163 ref NT_022517.16 Hs3_22673 | Sim4  | (11591856..11593602)                                                                                 |          | 100   | - | mRNA-like |
| gi 37550163 ref NT_022517.16 Hs3_22673 | Sim4  | (23222818..23224541)                                                                                 |          | 100   | + | mRNA-like |
| gi 37550163 ref NT_022517.16 Hs3_22673 | Sim4  | (45791077..45792508)                                                                                 |          | 100   | - | mRNA-like |
| gi 37550265 ref NT_029928.11 Hs3_30183 | Sim4  | (580974..583095)                                                                                     |          | 100   | - | mRNA-like |
| gi 37550163 ref NT_022517.16 Hs3_22673 | Sim4  | (52408578..52408607, 63223996..63226048)                                                             |          | 100   | - | mRNA-like |
| gi 37550867 ref NT_005612.14 Hs3_5769  | Sim4  | (52262572..52265960)                                                                                 |          | 100   | - | mRNA-like |
| gi 37550867 ref NT_005612.14 Hs3_5769  | Sim4  | (31455323..31456562, 31458590..31459572)                                                             |          | 100   | - | mRNA-like |
| gi 37550867 ref NT_005612.14 Hs3_5769  | Sim4  | (52282378..52283222)                                                                                 |          | 100   | - | mRNA-like |
| gi 37550163 ref NT_022517.16 Hs3_22673 | Sim4  | (52212445..52213993)                                                                                 |          | 100   | - | mRNA-like |
| gi 37550163 ref NT_022517.16 Hs3_22673 | Sim4  | (47568797..47568891, 47570427..47571759)                                                             |          | 100   | - | mRNA-like |
| gi 37550163 ref NT_022517.16 Hs3_22673 | Sim4  | (24475543..24475947, 24480988..24481467)                                                             |          | 100   | + | mRNA-like |
| gi 37549731 ref NT_022459.13 Hs3_22615 | Sim4  | (3039136..3039236, 3041007..3041187, 8021301..8022648, 8036121..8036406)                             |          | 100   | + | mRNA-like |
| gi 37550163 ref NT_022517.16 Hs3_22673 | Sim4  | (47105072..47105355, 47111094..47111315, 47111461..47112712)                                         |          | 100   | - | mRNA-like |
| gi 37550867 ref NT_005612.14 Hs3_5769  | Sim4  | (80405892..80407734)                                                                                 |          | 100   | + | mRNA-like |
| gi 37550867 ref NT_005612.14 Hs3_5769  | Sim4  | (14008076..14010715)                                                                                 |          | 100   | + | mRNA-like |
| gi 37550867 ref NT_005612.14 Hs3_5769  | Sim4  | (93145482..93147340)                                                                                 |          | 100   | + | mRNA-like |
| gi 37550163 ref NT_022517.16 Hs3_22673 | Sim4  | (65476338..65478088)                                                                                 |          | 100   | - | mRNA-like |
| gi 37550265 ref NT_029928.11 Hs3_30183 | Sim4  | (2164056..2165732)                                                                                   |          | 100   | + | mRNA-like |
| gi 37550163 ref NT_022517.16 Hs3_22673 | Sim4  | (15401391..15401544, 15443713..15444867)                                                             |          | 100   | - | mRNA-like |
| gi 37549731 ref NT_022459.13 Hs3_22615 | Sim4  | (8616673..8617239, 8621381..8621928, 10343372..10343666)                                             |          | 100   | - | mRNA-like |
| gi 37550163 ref NT_022517.16 Hs3_22673 | Sim4  | (15197617..15198757)                                                                                 |          | 100   | + | mRNA-like |
| gi 37550867 ref NT_005612.14 Hs3_5769  | Sim4  | (48371523..48373646)                                                                                 |          | 100   | - | mRNA-like |
| gi 37550867 ref NT_005612.14 Hs3_5769  | Sim4  | (55731415..55733549)                                                                                 |          | 100   | - | mRNA-like |
| gi 37550163 ref NT_022517.16 Hs3_22673 | Sim4  | (33530397..33531863)                                                                                 |          | 100   | - | mRNA-like |
| gi 37550867 ref NT_005612.14 Hs3_5769  | Sim4  | (32921349..32922647)                                                                                 |          | 100   | + | mRNA-like |
| gi 37550867 ref NT_005612.14 Hs3_5769  | Sim4  | (30153457..30155331)                                                                                 |          | 100   | - | mRNA-like |
| gi 37550163 ref NT_022517.16 Hs3_22673 | Sim4  | (29475116..29476981, 29477119..29477651)                                                             |          | 100   | + | mRNA-like |
| gi 37550163 ref NT_022517.16 Hs3_22673 | Sim4  | (49865921..49866635)                                                                                 |          | 100   | + | mRNA-like |
| gi 37549731 ref NT_022459.13 Hs3_22615 | Sim4  | (7256383..7258066)                                                                                   |          | 100   | - | mRNA-like |
| gi 37550867 ref NT_005612.14 Hs3_5769  | Sim4  | (20763762..20765265)                                                                                 |          | 100   | - | mRNA-like |
| gi 37550163 ref NT_022517.16 Hs3_22673 | Sim4  | (47314415..47316155)                                                                                 |          | 100   | + | mRNA-like |
| gi 37550890 ref NT_079506.1 Hs3_79571  | Sim4  | (119753..120733, 126199..126974)                                                                     |          | 100   | - | mRNA-like |
| gi 37550163 ref NT_022517.16 Hs3_22673 | Sim4  | (8558880..8559316)                                                                                   |          | 100   | - | mRNA-like |
| gi 37550867 ref NT_005612.14 Hs3_5769  | Sim4  | (6881187..6881818)                                                                                   |          | 100   | + | mRNA-like |
| gi 37549731 ref NT_022459.13 Hs3_22615 | Sim4  | (5724122..5724793)                                                                                   |          | 100   | - | mRNA-like |
| gi 37549731 ref NT_022459.13 Hs3_22615 | Sim4  | (2256655..2256942, 2261555..2261874)                                                                 |          | 100   | + | mRNA-like |
| gi 37550867 ref NT_005612.14 Hs3_5769  | Blast | 31445432                                                                                             | 31444937 | 84.92 | - | mRNA-like |

**Supplementary Table 3. Comprehensive predicted ncRNA candidates on human chromosome 3**

|                         | <b>5' Breakpoint Region</b> | <b>3' Breakpoint Region</b> |
|-------------------------|-----------------------------|-----------------------------|
| Human Chromosome 3      | 15,139,113-<br>15,162,936   | 131,200,609-131,414,315     |
| Chimpanzee Chromosome 2 | 15,744,734-<br>15,775,904   | 133,265,285-133,472,836     |
| Rhesus Scaffolds        | 120101:77,129-<br>77,135    | 45512:23,420-23,423         |

**Supplementary Table 4. Inversion breakpoint region coordinates in human (NCBI Build 35), chimpanzee (UCSC panTro1) and Rhesus macaque (HGSC Mmul\_0.1).**

| <b>Breakpoint</b> | <b>%<br/>Alu</b> | <b>%<br/>MIR</b> | <b>%<br/>LINE</b> | <b>%<br/>LTR</b> | <b>%<br/>DNA</b> | <b>%<br/>Simple<br/>Repeats</b> | <b>%<br/>Low<br/>Complexity</b> | <b>%<br/>Total<br/>Repeats</b> | <b>%<br/>GC</b> |
|-------------------|------------------|------------------|-------------------|------------------|------------------|---------------------------------|---------------------------------|--------------------------------|-----------------|
| Rhesus 5'         | 20.80            | 5.36             | 9.19              | 14.12            | 3.01             | 1.20                            | 1.49                            | 55.16                          | 48.90           |
| Rhesus 3'         | 2.95             | 4.44             | 24.02             | 8.48             | 2.60             | 3.87                            | 0.30                            | 46.65                          | 35.31           |
| Human 5'          | 17.91            | 5.32             | 8.27              | 14.30            | 1.82             | 0.48                            | 2.24                            | 50.33                          | 47.19           |
| Human 3'          | 3.06             | 4.65             | 21.22             | 8.96             | 7.85             | 1.28                            | 0.00                            | 47.01                          | 36.57           |
| Average<br>Human  | 10.60            | 2.20             | 20.42             | 8.29             | 2.84             |                                 |                                 |                                | 41.00           |

**Supplementary Table 5. Repeat and GC composition as percentages of 10 kbp windows spanning the Rhesus breakpoints and the orthologous human sequence.** Average human composition comes from International Human Genome Sequencing Consortium, 2001.

| <b>GENE SYMBOL</b> | <b># PUBMED REF</b> | <b># CANCER LIT</b> | <b>DESCRIPTION</b>                                                                                                                                                        |
|--------------------|---------------------|---------------------|---------------------------------------------------------------------------------------------------------------------------------------------------------------------------|
| SCLC1              | 23347               | 23347               | SMALL-CELL CANCER OF THE LUNG                                                                                                                                             |
| 544 TF             | 20773               | 2742                | TRANSFERRIN                                                                                                                                                               |
| TRH                | 12420               | 1401                | THYROTROPIN-RELEASING HORMONE                                                                                                                                             |
| GPX1               | 10445               | 1025                | GLUTATHIONE PEROXIDASE                                                                                                                                                    |
| ATOD               | 8116                | 0                   | DERMATITIS, ATOPIC                                                                                                                                                        |
| SERPINI1           | 7734                | 557                 | SERINE PROTEASE INHIBITOR, CLADE I, MEMBER 1 (SERPINI1)                                                                                                                   |
| MME                | 6572                | 1521                | MEMBRANE METALLOENDOPEPTIDASE                                                                                                                                             |
| AGTR1              | 6496                | 128                 | ANGIOTENSIN RECEPTOR 1                                                                                                                                                    |
| 488 CP             | 5723                | 461                 | CERULOPLASMIN                                                                                                                                                             |
| RHO                | 5638                | 117                 | RHODOPSIN                                                                                                                                                                 |
| CLCN2              | 3975                | 199                 | CHLORIDE CHANNEL 2                                                                                                                                                        |
| BCL6               | 3842                | 3708                | B-CELL LYMPHOMA 6; BCL6, BCL6/H4FM FUSION GENE, INCLUDED                                                                                                                  |
| MLF1               | 3627                | 3416                | MYELOID LEUKEMIA FACTOR 1                                                                                                                                                 |
| CTNNB1             | 3524                | 1737                | BETA-CATENIN                                                                                                                                                              |
| CCR5               | 2663                | 101                 | CHEMOKINE, CC MOTIF, RECEPTOR 5, CCR5, AIDS                                                                                                                               |
| TGFBR2             | 2465                | 763                 | TRANSFORMING GROWTH FACTOR, BETA RECEPTOR II                                                                                                                              |
| EGI3               | 2312                | 69                  | EPILEPSY, JUVENILE ABSENCE                                                                                                                                                |
| MYL3               | 2147                | 60                  | MYOSIN LIGHT CHAIN 3                                                                                                                                                      |
| THPO               | 2003                | 322                 | THROMBOPOIETIN; THPO,MYELOPROLIFERATIVE LEUKEMIA VIRUS ONCOGENE LIGAND,MEGAKARYOCYTE COLONY-                                                                              |
| SLC25A20           | 1720                | 37                  | CARNITINE-ACYLCARNITINE TRANSLOCASE, SOLUTE CARRIER FAMILY 25                                                                                                             |
| BCHE               | 1651                | 39                  | BUTYRYLCHOLINESTERASE                                                                                                                                                     |
| TGFBR2             | 1517                | 573                 | TRANSFORMING GROWTH FACTOR-BETA RECEPTOR, TYPE II                                                                                                                         |
| PPARG              | 1394                | 263                 | PEROXISOME PROLIFERATOR-ACTIVATED RECEPTOR-GAMMA, PAX8/PPARG FUSION                                                                                                       |
| DRD3               | 1393                | 16                  | DOPAMINE RECEPTOR D3, SCHIZOPHRENIA SUSEPTIBILITY                                                                                                                         |
| TKT                | 1364                | 53                  | TRANSKETOLASE                                                                                                                                                             |
| MYMY1              | 1364                | 83                  | Moyamoya Disease                                                                                                                                                          |
| VHL                | 1302                | 1066                | VON HIPPEL-LINDAU SYNDROME                                                                                                                                                |
| HYAL1              | 1237                | 146                 | HYALURONOGLUCOSAMINIDASE 1                                                                                                                                                |
| MLH1               | 1059                | 890                 | COLON CANCER, FAMILIAL NONPOLYPOSIS, TYPE 2                                                                                                                               |
| GP9                | 1042                | 53                  | GLYCOPROTEIN IX, PLATELET                                                                                                                                                 |
| GLB1               | 1034                | 43                  | GANGLIOSIDOSIS, GENERALIZED GM1, TYPE I, BETA-GALACTOSIDASE-1 DEFICIENCY, GLB1 DEFICIENCY, MORQUIO DISEASE, TYPE , MUCOPOLYSACCHARIDOSIS TYPE IV, ELASTIN-BINDING PROTEIN |
| PROS1              | 945                 | 106                 | PROTEIN S, ALPHA                                                                                                                                                          |
| THRB               | 921                 | 98                  | THYROID HORMONE RECEPTOR, BETA                                                                                                                                            |
| SI                 | 702                 | 95                  | Sucrase-Isomaltase                                                                                                                                                        |
| ZNF9               | 688                 | 147                 | ZINC FINGER PROTEIN 9                                                                                                                                                     |
| GHRL               | 652                 | 40                  | GHRELIN                                                                                                                                                                   |

|        |     |     |                                                                                                                             |
|--------|-----|-----|-----------------------------------------------------------------------------------------------------------------------------|
| ARVD5  | 637 | 5   | ARRHYTHMOGENIC RIGHT VENTRICULAR DYSPLASIA                                                                                  |
| CASR   | 637 | 77  | CALCIUM-SENSING RECEPTOR                                                                                                    |
| XPC    | 529 | 461 | XERODERMA PIGMENTOSUM, COMPLEMENTATION GROUP C                                                                              |
| CCR2   | 523 | 32  | HIV infection, susceptibility/resistance to                                                                                 |
| ADIPOQ | 500 | 12  | ADIPOSE MOST ABUNDANT GENE TRANSCRIPT 1                                                                                     |
| CX3CR1 | 475 | 48  | CHEMOKINE, CX3C MOTIF, RECEPTOR 1                                                                                           |
| HRG    | 456 | 13  | HISTIDINE-RICH GLYCOPROTEIN                                                                                                 |
| LPP    | 456 | 26  | LIM DOMAIN-CONTAINING PREFERRED TRANSLOCATION PARTNER IN LIPOMA, LPP/MLL FUSION, LPP/HMGIC FUSION                           |
| SLC2A2 | 444 | 53  | SOLUTE CARRIER FAMILY 2, GLUCOSE TRANSPORTER, LIVER/ISLET, Diabetes mellitus, noninsulin-dependent; Fanconi-Bickel syndrome |
| SPG14  | 435 | 44  | Spastic paraplegia 14, autosomal recessive                                                                                  |
| TERC   | 422 | 215 | TELOMERASE RNA COMPONENT                                                                                                    |
| PTHRI  | 353 | 49  | PARATHYROID HORMONE RECEPTOR 1                                                                                              |
| BTD    | 342 | 7   | BIOTINIDASE                                                                                                                 |
| MITF   | 283 | 66  | MICROPHthalmia-ASSOCIATED TRANSCRIPTION FACTOR                                                                              |

**Supplementary Table 6. The most referenced chromosome 3 disease phenotypes and associated genes.**

| <b>GENE SYMBOL # PUBMED REF# CANCER LIT DESCRIPTION</b> |      |      |                                                                                                                              |
|---------------------------------------------------------|------|------|------------------------------------------------------------------------------------------------------------------------------|
| <b>CANCER FUSIONS</b>                                   |      |      |                                                                                                                              |
| BCL6                                                    | 3842 | 3708 | B-CELL LYMPHOMA 6; BCL6, BCL6/H4FM FUSION GENE, INCLUDED                                                                     |
| PPARG                                                   | 1394 | 263  | PEROXISOME PROLIFERATOR-ACTIVATED RECEPTOR-GAMMA, PAX8/PPARG FUSION                                                          |
| LPP                                                     | 456  | 26   | LIM DOMAIN-CONTAINING PREFERRED TRANSLOCATION PARTNER IN LIPOMA, LPP/MLL FUSION, LPP/HMGIC FUSION                            |
| EVI1                                                    | 98   | 70   | ECOTROPIC VIRAL INTEGRATION SITE 1, AML1 in the 3;21 translocations: EVI1, EAP (180474), and MDS1 (600049). TEL--EAP--MDS1-- |
| MDS1                                                    | 60   | 39   | MDS1/AML1 FUSION GENE, AML1 and EVI1 oncogenic components are required for the cooperation of AML1/MDS1/EVI1 with BCR/ABL    |
| <b>CANCER GENES</b>                                     |      |      |                                                                                                                              |
| MLF1                                                    | 3627 | 3416 | MYELOID LEUKEMIA FACTOR 1                                                                                                    |
| CTNNB1                                                  | 3524 | 1737 | BETA-CATENIN                                                                                                                 |
| VHL                                                     | 1302 | 1066 | VON HIPPEL-LINDAU SYNDROME                                                                                                   |
| MLH1                                                    | 1059 | 890  | COLON CANCER, FAMILIAL NONPOLYPOSIS, TYPE 2                                                                                  |
| XPC                                                     | 529  | 461  | XERODERMA PIGMENTOSUM, COMPLEMENTATION GROUP C                                                                               |
| TERC                                                    | 422  | 215  | TELOMERASE RNA COMPONENT                                                                                                     |
| TP73L                                                   | 201  | 100  | TUMOR PROTEIN p73-LIKE                                                                                                       |
| THRB                                                    | 921  | 98   | THYROID HORMONE RECEPTOR, BETA                                                                                               |
| FANCD2                                                  | 68   | 42   | FANCONI ANEMIA, COMPLEMENTATION GROUP D2                                                                                     |
| ATR                                                     | 137  | 35   | ATAXIA-TELANGIECTASIA AND RAD3-RELATED                                                                                       |
| PIK3CA                                                  | 92   | 27   | PHOSPHATIDYLINOSITOL 3-KINASE, CATALYTIC, ALPHA                                                                              |
| ARMET                                                   | 65   | 17   | ARGININE-RICH, MUTATED IN EARLY STAGE TUMORS                                                                                 |
| TDGF1                                                   | 18   | 11   | TERATOCARCINOMA-DERIVED GROWTH FACTOR 1                                                                                      |
| RAB7                                                    | 217  | 8    | RAS-ASSOCIATED PROTEIN RAB7                                                                                                  |
| DIRC2                                                   | 6    | 6    | DISRUPTED IN RENAL CARCINOMA 2                                                                                               |
| <b>MOVEMENT DISORDERS</b>                               |      |      |                                                                                                                              |
| EGI3                                                    | 2312 | 69   | EPILEPSY, JUVENILE ABSENCE                                                                                                   |
| DRD3                                                    | 1393 | 16   | DOPAMINE RECEPTOR D3, SCHIZOPHRENIA SUSEPTIBILITY                                                                            |
| SPG14                                                   | 435  | 44   | SPASTIC PARAPLEGIA 14, AUTOSOMAL RECESSIVE                                                                                   |
| DM2                                                     | 248  | 0    | MYOTONIC MYOPATHY PROXIMAL                                                                                                   |
| SCA7                                                    | 117  | 1    | SPINOCEREBELLAR ATAXIA 7                                                                                                     |
| HMSNO                                                   | 33   | 0    | NEUROPATHY, HEREDITARY MOTOR AND SENSORY, OKINAWA TYPE                                                                       |
| ETM1                                                    | 26   | 0    | TREMOR FAMILIAL ESSENTIAL 1                                                                                                  |
| HSN1B                                                   | 2    | 0    | NEUROPATHY, HEREDITARY SENSORY, TYPE IB                                                                                      |
| <b>MENTAL DISORDERS</b>                                 |      |      |                                                                                                                              |
| AUTS3                                                   | 67   | 3    | AUTISM SUSCEPTIBILITY TO, 3                                                                                                  |
| DMT1                                                    | 6    | 0    | DEMENTIA, FAMILIAL, NONSPECIFIC                                                                                              |
| MRT2A                                                   | 1    | 0    | MENTAL RETARDATION, NONSYNDROMIC, AUTOSOMAL RECESSIVE, 2A                                                                    |
| <b>SYNDROMES AND MALFORMATIONS</b>                      |      |      |                                                                                                                              |
| VHL                                                     | 1302 | 1066 | VON HIPPEL-LINDAU SYNDROME                                                                                                   |
| SLC2A2                                                  | 444  | 53   | SOLUTE CARRIER FAMILY 2, GLUCOSE TRANSPORTER, LIVER/ISLET, Diabetes mellitus, noninsulin-dependent; Fanconi-Bickel syndrome  |
| CCM3                                                    | 268  | 104  | CEREBRAL CAVERNOUS MALFORMATIONS-3                                                                                           |
| AOMS1                                                   | 244  | 30   | ABDOMINAL OBESITY-METABOLIC SYNDROME QUANTITATIVE TRAIT LOCUS 1                                                              |
| MHS4                                                    | 181  | 2    | MALIGNANT HYPERTHERMIA SUSCEPTIBILITY 4                                                                                      |
| DYX5                                                    | 92   | 1    | DYSLEXIA, SPECIFIC 5                                                                                                         |

|        |    |   |                                        |
|--------|----|---|----------------------------------------|
| BBS3   | 61 | 4 | BARDET-BIEDL SYNDROME 3                |
| MFS2   | 59 | 5 | MARFAN SYNDROME, TYPE II               |
| MBS2   | 34 | 1 | Moebius syndrome-2                     |
| HSCRS2 | 27 | 2 | HIRSCHSPRUNG DISEASE, SHORT SEGMENT, 2 |
| LRS1   | 24 | 0 | LARSEN SYNDROME, AUTOSOMAL DOMINANT    |
| ACAA1  | 17 | 0 | Pseudo-Zellweger syndrome              |
| SLSN3  | 10 | 4 | Senior-Loken syndrome 3                |
| USH3A  | 7  | 0 | USHER SYNDROME                         |
| USH2B  | 6  | 0 | USHER SYNDROME, TYPE IIB               |
| AGS1   | 4  | 0 | Aicardi-Goutieres syndrome 1           |

#### CHEMOKINE RECEPTOR CLUSTER ON 3p

|        |      |     |                                                                                    |
|--------|------|-----|------------------------------------------------------------------------------------|
| CCR5   | 5333 | 203 | CHEMOKINE, CC MOTIF, RECEPTOR 5, AIDS - SUSCEPTIBILITY/RESISTENCE TO HIV INFECTION |
| CCR1   | 585  | 34  |                                                                                    |
| CCR3   | 554  | 24  |                                                                                    |
| CCR2   | 523  | 32  | SUSCEPTIBILITY/RESISTENCE TO HIV INFECTION                                         |
| CX3CR1 | 475  | 48  | CHEMOKINE, CX3C MOTIF, RECEPTOR 1                                                  |
| CCR4   | 352  | 28  |                                                                                    |
| CCR8   | 133  | 12  |                                                                                    |
| CCR9   | 46   | 5   |                                                                                    |
| XCR1   | 13   | 2   |                                                                                    |
| CCRL2  | 1    | 0   |                                                                                    |
| CCBP2  | 1    | 0   |                                                                                    |

#### DEVELOPMENTAL GENES AND TRANSCRIPTION FACTORS

|        |       |      |                                                |
|--------|-------|------|------------------------------------------------|
| TRH    | 12420 | 1401 | THYROTROPIN-RELEASING HORMONE                  |
| CTNNB1 | 3524  | 1737 | BETA-CATENIN                                   |
| THRB   | 921   | 98   | THYROID HORMONE RECEPTOR, BETA                 |
| PTHRI  | 353   | 49   | PARATHYROID HORMONE RECEPTOR 1                 |
| MITF   | 283   | 66   | MICROPHthalmia-ASSOCIATED TRANSCRIPTION FACTOR |
| SOX2   | 75    | 6    | SRY-BOX 2                                      |
| DAZL   | 62    | 1    | DELETED IN AZOOSPERMIA-LIKE                    |
| HESX1  | 53    | 0    | HOMEODOMAIN GENE EXPRESSED IN ES CELLS         |
| POU1F1 | 28    | 1    | POU DOMAIN, CLASS 1, TRANSCRIPTION FACTOR 1    |
| FOXL2  | 28    | 0    | FORKHEAD TRANSCRIPTION FACTOR FOXL2            |

#### HEARING DISORDERS

|        |   |   |                                                            |
|--------|---|---|------------------------------------------------------------|
| DFNA18 | 4 | 0 | DEAFNESS, AUTOSOMAL DOMINANT NONSYNDROMIC SENSORINEURAL 18 |
| DFNB15 | 3 | 0 | DEAFNESS AUTOSOMAL RECESSIVE 15                            |
| TMIE   | 2 | 0 | TRANSMEMBRANE INNER EAR-EXPRESSED GENE                     |
| DFNA44 | 1 | 0 | DEAFNESS AUTOSOMAL DOMINANT 44                             |

#### SKIN DISORDERS

|        |      |     |                                                                     |
|--------|------|-----|---------------------------------------------------------------------|
| ATOD   | 8116 | 224 | DERMATITIS, ATOPIC                                                  |
| PSORS5 | 119  | 15  | PSORIASIS SUSCEPTIBILITY 5                                          |
| ILVASC | 1    | 0   | ICHTHYOSIS, LEUKOCYTE VACUOLES, ALOPECIA AND SCLEROSING CHOLANGITIS |

#### CARDIAC DISEASES

|       |     |   |                                            |
|-------|-----|---|--------------------------------------------|
| ARVD5 | 637 | 5 | ARRHYTHMOGENIC RIGHT VENTRICULAR DYSPLASIA |
| CMD1E | 1   | 0 | CARDIOMYOPATHY, DILATED, 1E                |

#### DIABETES

|        |     |    |                                                                                                                             |
|--------|-----|----|-----------------------------------------------------------------------------------------------------------------------------|
| SLC2A2 | 444 | 53 | SOLUTE CARRIER FAMILY 2, GLUCOSE TRANSPORTER, LIVER/ISLET, DIABETES MELLITUS, NONINSULIN DEPENDENT; FANCONI-BICKEL SYNDROME |
| GLC1C  | 6   | 0  | GLAUCOMA 1C, PRIMARY OPEN ANGLE                                                                                             |

**Supplementary Table 7. The most referenced chromosome 3 disease phenotypes and causative genes sorted by function.**
